# Supplementary material
Source: Research Square preprint supplement (doi:10.21203/rs.3.rs-10229460/v1)
Supplement: Supplementary file 1 [file cb96e2aab658f61b0a7d4374.xlsx]

## Sheet: Article Data Supplement A
Article #	Title	Authors	Publication year	Geo. Region	Primary Specialty	Real vs. Simulated Patients	Retrospective v. Prospective	AI Type	Commercial v. Non-Commercial	Specific-use vs. General	Cohort size	Perceived AI Impact (pos., neut., neg.)	Diagnosis Targeted	Clinical Skills Targeted	Theoretical Knowledge	Treatment Decisions	Confidence	Clinical Impact Discussed	Limitations AI may overcome	AI Limitations	Automation Bias	Model Training & Architecture	Explainability	Deskilling	Hallucinations	Novice vs. Expert distinction	Novice performance boost	Expert-level Novice Performance	Expert performance boost
1	Artificial Intelligence-Guided Bronchoscopy is Superior to Human Expert Instruction for the Performance of Critical-Care Physicians: A Randomized Controlled Trial	Agbontaen, K.O. and Cold, K.M. and Woods, D. and Grover, V. and Soliman-Aboumarie, H.S. and Kaul, S. and Konge, L. and Singh, S.	2025	UK	Critical Care	Simulated	Prospective	DL	Commercial	Specific	40	pos.		1	1			1	1							1
2	Endoscopist deskilling risk after exposure to artificial intelligence in colonoscopy: a multicentre, observational study	Budzyń K, Romańczyk M, Kitala D, et al.	2025	Poland	Gastroenterology	Real	Retrospective	DL	Commercial	Specific	19	neg.	1						1	1	1			1
3	Empowering Radiologists With ChatGPT-4o: Comparative Evaluation of Large Language Models and Radiologists in Cardiac Cases	Cesur, T. and Gunes, Y.C. and Camur, E. and Dağlı, M.	2025	Turkey	Radiology	Real	Retrospective	LLM	Commercial	General	4	pos.	1						1	1		1				1	1	1
4	Large Language Model (LLM)-Predicted and LLM-Assisted Calculation of the Spinal Instability Neoplastic Score (SINS) Improves Clinician Accuracy and Efficiency	Chan, M.D.Z. and Tjio, C.K.E. and Chan, T.L.Y. and Tan, Y.L. and Chua, A.X.Y. and Loh, S.K.Y. and Leow, G.Z.H. and Gan, M.Y. and Lim, X. and Choo, A.K. and Liu, Y. and Tan, J.W.P. and Teo, E.C. and Yap, Q.V. and Yonghan, T. and Makmur, A. and Kumar, N. and Tan, J.H. and Hallinan, J.T.P.D.	2025	Singapore	Oncology	Real	Retrospective	LLM	Commercial	General	8	pos.	1						1	1		1
5	Artificial Intelligence in the Training of Radiology Residents: a Multicenter Randomized Controlled Trial	Chen, Y. and Sun, Z. and Lin, W. and Xv, Z. and Su, Q.	2025	China	Radiology	Real	Retrospective	Machine Learning	Commercial	Specific	28	pos.	1				1		1	1		1
6	Artificial Intelligence improves bronchoscopy performance: a randomised crossover trial	Cold et al.,	2025	Denmark	Pulmonology	Simulated	Prospective	DL	Commercial	Specific	101	pos.		1					1	1		1				1	1		1
7	Simulation-based training intervention using artificial intelligence to improve clinical bronchoscopy performance: a pre‚Äìpostintervention study	Cold, K.M. and Arshad, A. and Kildegaard, C. and Laursen, C.B. and Konge, L. and Nielsen, A.B.	2025	Denmark	Pulmonology	Simulated	Prospective	DL	Commercial	Specific	9	neut.		1				1	1							1
8	Ultrasound S-detect system can improve diagnostic performance of less experienced radiologists in differentiating breast masses: a retrospective dual-centre study	Du, L. and Liu, H. and Cai, M. and Pan, J. and Zha, H. and Nie, C. and Lin, M. and Li, C. and Zong, M. and Zhang, B.	2025	China	Radiology	Real	Retrospective	CNN	Commercial	Specific	6	pos.	1						1							1	1		1
9	Human-AI collaboration for ultrasound diagnosis of thyroid nodules: a clinical trial	Edström, A.B. and Makouei, F. and Wennervaldt, K. and Lomholt, A.F. and Kaltoft, M. and Melchiors, J. and Hvilsom, G.B. and Bech, M. and Tolsgaard, M. and Todsen, T.	2025	Denmark	Otorhinolaryngology	Real	Prospective	CNN	Commercial	Specific	20	neutr.	1	1		1			1	1		1				1
10	The role of artificial intelligence in surgeon-performed ultrasonographic evaluation of cytologically indeterminate thyroid nodules	Fung, M.H.M. and Ng, W.I. and Lee, H.E. and Chan, T.H. and Leung, S.T.K. and Luk, Y. and Lang, B.H.H.	2025	China	Surgery	Real	Retrospective	CNN	Commercial	Specific	6	pos.	1		1				1							1	1	1
11	Non-task expert physicians benefit from correct explainable AI advice when reviewing X-rays	Gaube, Susanne; Suresh, Harini; Raue, Martina; Lermer, Eva; Koch, Timo K.; Hudecek, Matthias F. C.; Ackery, Alun D.; Grover, Samir C.; Coughlin, Joseph F.; Frey, Dieter; Kitamura, Felipe C.; Ghassemi, Marzyeh; Colak, Errol	2023	Germany	Radiology	Simulated	Retrospective	DL	Commercial	Specific	223	pos.	1				1		1	1			1			1	1		1
12	Combining artificial intelligence and human expertise for more accurate dermoscopic melanoma diagnosis: A 2-session retrospective reader study	Giulini et al.	2024	Germany	Dermatology	Simulated	Retrospective	CNN	Non-Comm.	Specific	64	pos.	1													1	1
13	Large Language Model Influence on Diagnostic Reasoning: A Randomized Clinical Trial	Goh, E. and Gallo, R. and Hom, J. and Strong, E. and Weng, Y. and Kerman, H. and Cool, J.A. and Kanjee, Z. and Parsons, A.S. and Ahuja, N. and Horvitz, E. and Yang, D. and Milstein, A. and Olson, A.P.J. and Rodman, A. and Chen, J.H.	2024	US	Internal Medicine	Simulated	Prospective	LLM	Commercial	General	50	neutr.	1						1							1
14	Influence of AI Decision Support on Radiologists‚Äô Performance and Visual Search in Screening Mammography	Gommers, J.J.J. and Verboom, S.D. and Duvivier, K.M. and Rooden, C.J.V. and Raamt, A.F.V. and Houwers, J.B. and Naafs, D.B. and Duijm, L.E.M. and Eckstein, M.P. and Abbey, C.K. and Broeders, M.J.M. and Sechopoulos, I.	2025	Netherlands	Radiology	Real	Retrospective	CNN	Commercial	Specific	12	pos.	1						1	1	1						1		1
15	Artificial intelligence stenosis diagnosis in coronary CTA: effect on the performance and consistency of readers with less cardiovascular experience	Han, X. and Luo, N. and Xu, L. and Cao, J. and Guo, N. and He, Y. and Hong, M. and Jia, X. and Wang, Z. and Yang, Z.	2022	China	Radiology	Real	Retrospective	CNN	Commercial	Specific	6	pos.	1						1							1	1
16	AI-assisted chest radiograph interpretation enhances diagnostic confidence and standardizes diagnostic accuracy across radiologists: A multi-reader study	Huang, H.-Y. and Huang, Y.-H. and Lin, C.-H. and Tao, W.-T. and Liao, W.-C. and Yu, S. and Mo, H.-C. and Feng, W. and Hsu, Y.-T. and Wang, J.-C. and Ko, K.-H.	2026	Taiwan	Radiology	Real	Retrospective	DL	Commercial	Specific	12	pos.	1				1		1	1	1					1	1
17	Impact of an artificial intelligence decision support system among radiologists with different levels of experience in breast ultrasound: A prospective study in a tertiary center	Irmici, G. and Cozzi, A. and Depretto, C. and Della Pepa, G. and Ancona, E. and Bonanomi, A. and Ballerini, D. and D‚ÄôAscoli, E. and de Berardinis, C. and Marziali, S. and Giambersio, E. and Scaperrotta, G.	2025	Italy	Radiology	Real	Prospective	Machine Learning (Proprietary (company secret))	Commercial	Specific	3	pos.	1					1	1							1	1	1
18	Enhancing puncture skills training with generative AI and digital technologies: a parallel cohort study	Ji, Z. and Jiang, Y. and Sun, H. and Qiu, B. and Chen, Y. and Li, M. and Fan, J. and Wang, J.	2024	China	Radiology	Simulated	Prospective	LLM	Commercial	General	90	pos.		1	1			1	1							1
19	The impact of deep learning on diagnostic performance in the differentiation of benign and malignant thyroid nodules	Kaba, E. and Solak, M. and Varlƒ±k, A.T. and √áubuk√ßu, Y. and Sagir, L. and Sunnetci, K.M. and Alkan, A. and G√ºndoƒüdu, H. and Beyazal √áeliker, F.B. and Beyazal, M.	2025	Turkey	Radiology	Real	Retrospective	CNN	Non-Comm.	Specific	5	pos.	1						1							1	1	1
20	Video-Based Performance Analysis in Pituitary Surgery - Part 2: Artificial Intelligence Assisted Surgical Coaching	Khan, D.Z. and Newall, N. and Koh, C.H. and Das, A. and Aapan, S. and Layard-Horsfall, H. and Baldeweg, S.E. and Bano, S. and Borg, A. and Chari, A. and Dorward, N.L. and Elserius, A. and Giannis, T. and Jain, A. and Stoyanov, D. and Marcus, H.J.	2024	UK	Neurosurgery	Real	Retrospective	CNN	Non-Comm.	Specific	6	pos.		1	1			1	1
21	Enhancing diagnostic accuracy of thyroid nodules: integrating self-learning and artificial intelligence in clinical training	Kim, D. and Hwang, Y.-A. and Kim, Y. and Lee, H.S. and Lee, E. and Lee, H. and Yoon, J.H. and Park, V.Y. and Rho, M. and Yoon, J. and Lee, S.E. and Kwak, J.Y.	2025	Korea	Internal Medicine	Simulated	Prospective	CNN	Non-Comm.	Specific	29	pos.	1		1				1	1	1
22	An artificial intelligence-based nerve recognition model is useful as surgical support technology and as an educational tool in laparoscopic and robot-assisted rectal cancer surgery	Kinoshita, K. and Maruyama, T. and Kobayashi, N. and Imanishi, S. and Maruyama, M. and Ohira, G. and Endo, S. and Tochigi, T. and Kinoshita, M. and Fukui, Y. and Kumazu, Y. and Kita, J. and Shinohara, H. and Matsubara, H.	2024	Japan	Gastroenterology	Real	Retrospective	CNN	Non-Comm.	Specific	23	pos.			1				1							1	1
23	Evaluation of physician performance using a concurrent-read artificial intelligence system to support breast ultrasound interpretation	Lai, Y.-C. and Chen, H.-H. and Hsu, J.-F. and Hong, Y.-J. and Chiu, T.-T. and Chiou, H.-J.	2022	Taiwan	Radiology	Real	Retrospective	DL	Commercial	Specific	16	pos.	1							1		1				1	1
24	Impact of an AI software on the diagnostic performance and reading time for the detection of cerebral aneurysms on time of flight MR-angiography	Lehnen, N.C. and Schievelkamp, A.-H. and Gronemann, C. and Haase, R. and Krause, I. and Gansen, M. and Fleckenstein, T. and Dorn, F. and Radbruch, A. and Paech, D.	2024	Germany	Radiology	Real	Retrospective	CNN	Commercial	Specific	6	pos.	1													1
25	Enhancing trainee performance in obstetric ultrasound through an artificial intelligence system: randomized controlled trial	Lei, T. and Zheng, Q. and Feng, J. and Zhang, L. and Zhou, Q. and He, M. and Lin, M. and Xie, H.N.	2024	China	Obstetrics and Gynocology	Real	Prospective	CNN	Non-Comm.	Specific	32	pos.		1					1
26	Computed tomography (CT) structured reporting generation based on the intelligent assisted diagnosis system for rectal cancer staging and evaluation of its clinical application	Liu, K. and Qiu, C. and Xia, Y. and Li, C. and Zhang, H. and Guo, W. and Wang, W. and Wan, S. and Zou, B.	2025	China	Radiology	Real	Retrospective	CNN	Non-Comm.	Specific	6	pos.	1			1			1								1	1
27	Application of an artificial intelligence-based airway identification system in tracheal intubation	Liu, K. and Tang, H. and Wang, Z.	2026	China	Emergency	Simulated	Retrospective	CNN	Non-Comm.	Specific	72	pos.		1					1
28	Improving the Real-time Classification of Disease Severity in Ulcerative Colitis: Artificial Intelligence as the Trigger for a Second Opinion	Lo, B. and M√∏ller, B. and Igel, C. and Wildt, S. and Vind, I. and Bendtsen, F. and Burisch, J. and Ibragimov, B.	2025	Denmark	Gastroenterology	Real	Retrospective	CNN	Non-Comm.	Specific	24	pos.	1						1							1	1	1
29	Evaluating the impact of AI assistance on decision-making in emergency doctors interpreting chest X-rays: a multi-reader multi-case study	Lyell, D. and Dinh, M. and Gillett, M. and Abraham, N. and Symes, E.R. and Susanto, A.P. and Chakar, B.A. and Seimon, R.V. and Coiera, E. and Magrabi, F.	2025	Australia	Emergency	Simulated	Prospective	CNN	Commercial	Specific	200	pos.	1	1		1	1		1	1	1						1
30	Leveraging the Capabilities of AI: Novice Neurology-Trained Operators Performing Cardiac POCUS in Patients with Acute Brain Injury	Mears, J. and Kaleem, S. and Panchamia, R. and Kamel, H. and Tam, C. and Thalappillil, R. and Murthy, S. and Merkler, A.E. and Zhang, C. and Ch'ang, J.H.	2024	US	Neurology	Real	Retrospective	DL	Commercial	Specific	42	pos.		1		1	1	1	1	1		1
31	Influence of artificial intelligence on the diagnostic performance of endoscopists in the assessment of Barrett's esophagus: A tandem randomized and video trial	Meinikheim, M. and Mendel, R. and Palm, C. and Probst, A. and Muzalyova, A. and Scheppach, M.W. and Nagl, S. and Schnoy, E. and Rommele, C. and Schulz, D.A.H. and Schlottmann, J. and Prinz, F. and Rauber, D. and R√ºckert, T. and Matsumura, T. and Fern√°ndez-Esparrach, G. and Parsa, N. and Byrne, M.F. and Messmann, H. and Ebigbo, A.	2024	Germany	Gastroenterology	Real	Prospective	CNN	Non-Comm.	Specific	22	pos.	1				1		1	1		1				1	1	1
32	Artificial Intelligence Improves the Ability of Physicians to Identify Prostate Cancer Extent	Mota, S.M. and Priester, A. and Shubert, J. and Bong, J. and Sayre, J. and Berry-Pusey, B. and Brisbane, W.G. and Natarajan, S.	2024	US	Urology	Real	Retrospective	CNN	Commercial	Specific	10	pos.	1			1			1	1	1					1
33	Evaluation of the impact of artificial intelligence-assisted image interpretation on the diagnostic performance of clinicians in identifying pneumothoraces on plain chest X-ray: a multi-case multi-reader study	Novak, A. and Ather, S. and Gill, A. and Aylward, P. and Maskell, G. and Cowell, G.W. and Morgado, A.T.E. and Duggan, T. and Keevill, M. and Gamble, O. and Akrama, O. and Belcher, E. and Taberham, R. and Hallifax, R. and Bahra, J. and Banerji, A. and Bailey, J. and James, A. and Ansaripour, A. and Spence, N. and Wrightson, J. and Jarral, W. and Barry, S. and Bhatti, S. and Astley, K. and Shadmaan…	2024	UK	Emergency	Real	Prospective	DL	Commercial	Specific	18	pos.	1				1			1				1		1	1	1
34	The implementation of computer-aided detection in an initial endoscopy training improves the quality measures of trainees‚Äô future colonoscopies: a retrospective cohort study	Orzeszko, Z. and Gach, T. and Necka, S. and Ochwat, K. and Major, P. and Szura, M.	2025	Poland	Gastroenterology	Real	Retrospective	CNN	Commercial	Specific	6	pos.	1	1					1
35	Effect of Deep Learning-Based Artificial Intelligence on Radiologists‚Äô Performance in Identifying Nigrosome 1 Abnormalities on Susceptibility Map-Weighted Imaging	Park, J. and Lim, C.Y. and Won, S.Y. and Na, H.K. and Lee, P.H. and Baek, S.-Y. and Roh, Y.H. and Seong, M. and Sim, Y. and Kim, E.Y. and Kim, S.T. and Sohn, B.	2025	Korea	Radiology	Real	Retrospective	CNN	Commercial	Specific	4	pos.	1						1							1	1	1
36	Artificial Intelligence-Based Diagnostic Support System for Patent Ductus Arteriosus in Premature Infants	Park, S. and Moon, J. and Eun, H. and Hong, J.-H. and Lee, K.	2024	Korea	Pediatrics	Real	Retrospective	Machine Learning (Random Forest)	Non-Comm.	Specific	19	pos.	1						1	1			1
37	Care to Explain? AI Explanation Types Differentially Impact Chest Radiograph Diagnostic Performance and Physician Trust in AI	Prinster, D. and Mahmood, A. and Saria, S. and Jeudy, J. and Lin, C.T. and Yi, P.H. and Huang, C.-M.	2024	US	Radiology	Real	Prospective	DL	Commercial	Specific	220	mixed	1				1		1	1	1		1			1
38	Artificial Intelligence for Real-Time Prediction of the Histology of Colorectal Polyps by General Endoscopists	Rex, D.K. and Bhavsar-Burke, I. and Buckles, D. and Burton, J. and Cartee, A. and Comar, K. and Edwards, A. and Fennimore, B. and Fischer, M. and Gerich, M. and Gilmore, A. and Hamdeh, S. and Hoffman, J. and Ibach, M. and Jackson, M. and James-Stevenson, T. and Kaltenbach, T. and Kaplan, J. and Kapur, S. and Kohm, D. and Kriss, M. and Kundumadam, S. and Kyanam-Kabir-Baig, K.R. and Menard-Katcher,…	2024	US	Gastroenterology	Real	Prospective	CNN	Non-Comm.	Specific	49	mixed	1						1
39	Nonradiology Health Care Professionals Significantly Benefit From AI Assistance in Emergency-Related Chest Radiography Interpretation	Rudolph, J. and Huemmer, C. and Preuhs, A. and Buizza, G. and Hoppe, B.F. and Dinkel, J. and Koliogiannis, V. and Fink, N. and Goller, S.S. and Schwarze, V. and Mansour, N. and Schmidt, V.F. and Fischer, M. and J√∂rgens, M. and Ben Khaled, N. and Liebig, T. and Ricke, J. and Rueckel, J. and Sabel, B.O.	2024	Germany	Radiology	Real	Retrospective	CNN	Non-Comm.	Specific	9	pos.	1						1	1	1					1	1	1
40	Artificial intelligence-enhanced navigation for nerve recognition and surgical education in laparoscopic colorectal surgery	Ryu, S. and Imaizumi, Y. and Goto, K. and Iwauchi, S. and Kobayashi, T. and Ito, R. and Nakabayashi, Y.	2025	Japan	Gastroenterology	Real	Prospective	DL	Commercial	Specific	10	neutr.		1	1				1							1	1
41	Artificial Intelligence-Powered Clinical Decision Support and Simulation Platform for Radiology Trainee Education	Shah, C. and Davtyan, K. and Nasrallah, I. and Bryan, R.N. and Mohan, S.	2023	US	Radiology	Real	Retrospective	Machine Learning	Commercial	Specific	10	neutr.		1	1		1		1							1
42	AI-augmented clinical decision in paediatric appendicitis: can an AI-generated model improve trainees‚Äô diagnostic capability?	Shikha, A. and Kasem, A. and Han, W.S.P. and Wong, J.H.L.	2024	Brunei	Pediatrics	Real	Prospective	Machine Learning (Decision Tree)	Non-Comm.	Specific	8	pos.	1						1							1	1	1
43	The virtual reference radiologist: comprehensive AI assistance for clinical image reading and interpretation	Siepmann, R. and Huppertz, M. and Rastkhiz, A. and Reen, M. and Corban, E. and Schmidt, C. and Wilke, S. and Schad, P. and Yuksel, C. and Kuhl, C. and Truhn, D. and Nebelung, S.	2024	Germany	Radiology	Real	Retrospective	LLM	Commercial	General	6	pos.	1				1			1	1				1
44	Assessing the Performance of Artificial Intelligence Assistance for Prostate MRI: A Two-Center Study Involving Radiologists With Different Experience Levels	Sun, Z. and Wang, K. and Gao, G. and Wang, H. and Wu, P. and Li, J. and Zhang, X. and Wang, X.	2025	China	Radiology	Real	Retrospective	DL	Non-Comm.	Specific	16	pos.	1	1				1	1							1	1	1
45	A Deep Learning Model Enhances Clinicians' Diagnostic Accuracy to More Than 96% for Anterior Cruciate Ligament Ruptures on Magnetic Resonance Imaging	Wang, D.-Y. and Liu, S.-G. and Ding, J. and Sun, A.-L. and Jiang, D. and Jiang, J. and Zhao, J.-Z. and Chen, D.-S. and Ji, G. and Li, N. and Yuan, H.-S. and Yu, J.-K.	2024	China	Radiology	Real	Retrospective	CNN	Non-Comm.	Specific	38	pos.	1						1							1	1	1	1
46	Comparative analysis of traditional and integrated approaches to radiology training for residents	Wang, J. and Wang, L. and Yang, Z. and Zou, Q. and Liu, Y.	2025	China	Radiology	Simulated	Prospective	DL	Commercial	Specific	100	pos.		1	1				1
47	Using an artificial intelligence software improves emergency medicine physician intracranial haemorrhage detection to radiologist levels	Warman, P. and Warman, A. and Warman, R. and Degnan, A. and Blickman, J. and Smith, D. and McHale, P. and Coburn, Z. and McCormick, S. and Chowdhary, V. and Dash, D. and Sangal, R. and Vadhan, J. and Bueso, T. and Windisch, T. and Neves, G.	2024	US	Emergency	Real	Retrospective	DL	Commercial	Specific	5	pos.	1						1							1	1	1
48	Impact of an AI-based laparoscopic cholecystectomy coaching program on the surgical performance: a randomized controlled trial	Wu, S. and Tang, M. and Liu, J. and Qin, D. and Wang, Y. and Zhai, S. and Bi, E. and Li, Y. and Wang, C. and Xiong, Y. and Li, G. and Gao, F. and Cai, Y. and Gao, P. and Wu, Z. and Cai, H. and Liu, J. and Chen, Y. and Fang, C. and Yao, L. and Jiang, J. and Peng, B. and Wu, H. and Li, A. and Wang, X.	2024	China	Surgery	Real	Prospective	DL	Commercial	Specific	18	pos.		1					1
49	A large language model improves clinicians‚Äô diagnostic performance in complex critical illness cases	Wu, X. and Huang, Y. and He, Q.	2025	China	Critical Care	Real	Prospective	LLM	Commercial	General	32	pos.	1							1					1
50	A deep learning algorithm that aids visualization of femoral neck fractures and improves physician training	Xing, P. and Zhang, L. and Wang, T. and Wang, L. and Xing, W. and Wang, W.	2024	China	Orthopedics	Real	Retrospective	CNN	Non-Comm.	Specific	20	pos.	1						1
51	Development and Validation an AI Model to Improve the Diagnosis of Deep Infiltrating Endometriosis for Junior Sonologists	Xu, J. and Zhang, A. and Zheng, Z. and Cao, J. and Zhang, X.	2025	China	Obstetrics and Gynocology	Real	Retrospective	CNN	Non-Comm.	Specific	2	pos.	1						1
52	Impact of an artificial intelligence-aided endoscopic diagnosis system on improving endoscopy quality for trainees in colonoscopy: Prospective, randomized, multicenter study	Yamaguchi, D. and Shimoda, R. and Miyahara, K. and Yukimoto, T. and Sakata, Y. and Takamori, A. and Mizuta, Y. and Fujimura, Y. and Inoue, S. and Tomonaga, M. and Ogino, Y. and Eguchi, K. and Ikeda, K. and Tanaka, Y. and Takedomi, H. and Hidaka, H. and Akutagawa, T. and Tsuruoka, N. and Noda, T. and Tsunada, S. and Esaki, M.	2024	Japan	Gastroenterology	Real	Prospective	DL	Commercial	Specific	6	neutr.	1						1							1
53	Accuracy of radiologists and radiology residents in detection of paediatric appendicular fractures with and without artificial intelligence	Yogendra, P.M. and Goh, A.G.W. and Yee, S.Y. and Jawan, F. and Koh, K.K.N. and Tan, T.S.E. and Woon, T.K. and Yeap, P.M. and Tan, M.O.	2024	Singapore	Radiology	Real	Retrospective	DL	Commercial	Specific	2	pos.	1						1	1		1		1		1	1
54	Deep Learning-Assisted Quantitative Measurement of Thoracolumbar Fracture Features on Lateral Radiographs	Yuh, W.T. and Khil, E.K. and Yoon, Y.S. and Kim, B. and Yoon, H. and Lim, J. and Lee, K.Y. and Yoo, Y.S. and An, K.D.	2024	Korea	Neurosurgery	Real	Retrospective	CNN	Non-Comm.	Specific	4	pos.		1					1							1
55	Artificial intelligence improves resident detection of pediatric and young adult upper extremity fractures	Zech, J.R. and Ezuma, C.O. and Patel, S. and Edwards, C.R. and Posner, R. and Hannon, E. and Williams, F. and Lala, S.V. and Ahmad, Z.Y. and Moy, M.P. and Wong, T.T.	2024	US	Radiology	Real	Retrospective	CNN	Non-Comm.	Specific	7	pos.	1	1					1	1	1	1				1	1	1
56	A study on the improvement in the ability of endoscopists to diagnose gastric neoplasms using an artificial intelligence system	Zhang, B. and Zhang, W. and Yao, H. and Qiao, J. and Zhang, H. and Song, Y.	2024	China	Gastroenterology	Real	Retrospective	CNN	Commercial	Specific	10	pos.	1						1							1	1
57	Comparison of an AI-assisted system (S-detect) and sonographers of different experience levels in diagnosing thyroid nodules: a retrospective study	Zheng, Zhenhao; Yu, Yang; Li, Jun; Ma, Ting; Liu, Wen	2025	China	Endocrinology	Real	Retrospective	CNN	Commercial	Specific	Unreported	pos.	1						1							1	1
58	Enhancing Radiologists‚Äô Performance in Detecting Cerebral Aneurysms Using a Deep Learning Model: A Multicenter Study	Zhuo, L. and Zhang, Y. and Song, Z. and Mo, Z. and Xing, L. and Zhu, F. and Meng, H. and Chen, L. and Qu, G. and Jiang, P. and Wang, Q. and Cheng, R. and Mi, X. and Liu, L. and Hong, N. and Cao, X. and Wu, D. and Wang, J. and Yin, X.	2025	China	Radiology	Real	Retrospective	DL	Commerical	Specific	10	pos.	1	1					1							1	1	1	1
				18/58 from China	24/58 Radiology	47 Real 11 Simulated	38 Retrospective 20 Prospective	29/58 use CNNs 18/58 noted DL (no other specifications) 6/58 use LLMs 5/58 ML	2/58 Non-commercial 38/58 Commercial models used	6/58 general-use models 52/58 specific-use models	Mean: 32 Median: 12 Mode: 6 Std.: 50 Range: 221	49/58 statistically significant "positive" outcomes with the use of AI 6/58 neutral; 2/58 mixed; 1/58 negative	44/58 articles address the impact of AI on diagnostic outcomes	19/58 articles address the impact of AI on clinical skills	9/58 articles address the impact of AI on theoretical knowledge	5/58 articles address the impact of AI on treatment decisions	10/58 articles address the impact of AI on the confidence of physicians	Only 7 articles addressed distinctions between statistical significance and clinical significance, with only one specifically testing clinical impact; 6 noted the need for future studies to test for clinical significance.	52/58 articles note significant issues in clinical practice that AI may address Consistency issues: 2 Required expertise and care demands (e.g., increased patient volume): 15 Resource/environment variability: 12	23/58 note limitations with AI	10/58 mentions issues of automation bias	10/58 mention issues with model training and architecture	3/58 mention explainability/transparency issue	3/58 mention deskilling	2/58 mention hallucinations	38/58 test distinction between novices and experts	30/58 note a performance boost for novices 16/58 reach expert-level performance	16/30 note performance boost similar to expert-level (without AI)	6/58 note a performance boost in experts - 1 boost in confidence - 2 boost in clinical skill - 4 boost in Dx

## Sheet: Article Data Supplement B
Article #	Title	Authors	Real vs. Simulated Patients	Retrospective v. Prospective	Comparison Detail	Timeline of Comparison	Overall Cohort size	Apparent Deskilling	Target Clinical Task
1	Artificial Intelligence-Guided Bronchoscopy is Superior to Human Expert Instruction for the Performance of Critical-Care Physicians: A Randomized Controlled Trial	Agbontaen, K.O. and Cold, K.M. and Woods, D. and Grover, V. and Soliman-Aboumarie, H.S. and Kaul, S. and Konge, L. and Singh, S.	Simulated	Prospective	Simulated silicon bronchoscopy model; pre-training baseline bronchoscopy, followed by 30 minute AI training; 19 randomized to AI training group, the other 21 to an expert tutor group. A final bronchoscopy was done without AI assistance directly after the 30 minute training	Single day participation	40	No: "Mean intersegmental time (MIT = PT/DC), diagnostic completeness (DC), procedure time (PT), structured progress (SP), and number of segments revisited (SR) were measured. The primary outcome measure assessed was MIT, a measure of bronchoscopic performance efficiency. The secondary outcome measures were DC, PT, SP, and SR. Nineteen participants were randomized to the AIG and 21 participants to…	Bronchoscopy
2	Endoscopist deskilling risk after exposure to artificial intelligence in colonoscopy: a multicentre, observational study	Budzyń K, Romańczyk M, Kitala D, Kołodziej P, Bugajski M, Adami HO, Blom J, Buszkiewicz M, Halvorsen N, Hassan C, Romańczyk T, Holme Ø, Jarus K, Fielding S, Kunar M, Pellise M, Pilonis N, Kamiński MF, Kalager M, Bretthauer M, Mori Y	Real	Retrospective	Looked at 3 months prior and 3 months after AI implementation; specifically, the "quality of all diagnostic, non-AI assisted colonscopies" within the periods 3 months before AI implementation and 3 months after. The centers switched between AI-use days and no AI-use days.	6 month period (3 months with AI use)	19	Yes: "The ADR of standard colonoscopy decreased significantly from 28·4% (226 of 795) before to 22·4% (145 of 648) after exposure to AI, corresponding with an absolute difference of –6·0% (95% CI –10·5 to –1·6; p=0·0089). In multivariable logistic regression analysis, exposure to AI (odds ratio 0·69 [95% CI 0·53–0·89]), male versus female patient sex (1·78 [1·38–2·30]), and patient age ≥60 years …	Colonoscopy
6	Artificial Intelligence improves bronchoscopy performance: a randomised crossover trial	Cold et al.,	Simulated	Prospective	Silicone model; One group performed an AI-guided bronchoscopy first, then a second without. Only two bronchoscopies were done.	Single day participation	101	No: "AI guidance caused the participants to inspect more segments (mean difference, paired t-test: +6.0 segments, p<0.001), perform more structured progressions (+5.2 progressions, p<0.001) and spend more time on the procedure (+72 s, p<0.001) compared to their standard procedures. The effects of AI guidance on inspected segments and structured progression were highest for novices but significant…	Bronchoscopy
7	Simulation-based training intervention using artificial intelligence to improve clinical bronchoscopy performance: a pre‚Äìpostintervention study	Cold, K.M. and Arshad, A. and Kildegaard, C. and Laursen, C.B. and Konge, L. and Nielsen, A.B.	Simulated	Prospective	Silicone model. 3 pre-intervention bronchoscopies done, then underwent simulation training w AI, then two to three post-intervention bronchoscopies	Two week period	9	Neutral: "The primary outcome measures showed no statistically significant difference between the pre- and postintervention bronchoscopies DC: 53% versus 59%, p=0.16, SP: 29% versus 32%, p=0.35 and PT: 219 s versus 181 s, p=0.22. The experienced outperformed the intermediates regarding DC: 73% versus 43%, p<0.001, SP: 47% versus 13%, p<0.001 and procedure efficiency: 533 s/full inspection versus …	Bronchoscopy
22	An artificial intelligence-based nerve recognition model is useful as surgical support technology and as an educational tool in laparoscopic and robot-assisted rectal cancer surgery	Kinoshita, K. and Maruyama, T. and Kobayashi, N. and Imanishi, S. and Maruyama, M. and Ohira, G. and Endo, S. and Tochigi, T. and Kinoshita, M. and Fukui, Y. and Kumazu, Y. and Kita, J. and Shinohara, H. and Matsubara, H.	Real	Retrospective	Participants viewed surgical videos to identify nerves; those scoring (n = 11)below a specific number were shown a 1 minute AI-analysed video of another patient, then underwent another nerve recognition test. Scores were compared before and after AI video	Single day participation	23	No: "The colorectal surgeons revealed an under-detection score of 0.80 (± 0.47), an over-detection score of 0.58 (± 0.41), and a usefulness evaluation score of 3.38 (± 0.43). The nerve recognition scores of non-colorectal surgeons, rotating residents, and medical students significantly improved by simply watching the AI nerve recognition videos for 1 min. Notably, medical students showed a more s…	Rectal cancer surgery
24	Impact of an AI software on the diagnostic performance and reading time for the detection of cerebral aneurysms on time of flight MR-angiography	Lehnen, N.C. and Schievelkamp, A.-H. and Gronemann, C. and Haase, R. and Krause, I. and Gansen, M. and Fleckenstein, T. and Dorn, F. and Radbruch, A. and Paech, D.	Real	Retrospective	CNN-assisted reading of MRIs, then after six weeks, unassisted reading	6-week washout period	6	Mixed: "Significant improvements of overall specificity and the overall number of false positives per case were observed in the reading with AI support. For the physicians, we found significant improvements of sensitivity on lesion and patient level and false positives per case. Four readers experienced reduced reading times with the software, while two encountered increased times."	Cerebral aneursym detection
25	Enhancing trainee performance in obstetric ultrasound through an artificial intelligence system: randomized controlled trial	Lei, T. and Zheng, Q. and Feng, J. and Zhang, L. and Zhou, Q. and He, M. and Lin, M. and Xie, H.N.	Real	Prospective	AI-assisted training group (n = 16); four-cycle training program (20 practice scans per cycle). At the end of each cycle, a training scan was conducted without the use of AI to assess abilities.	Unspecified	32	No: "The PSAIS-assisted trainee group required signiﬁcantly fewer training cycles compared with the non-PSAIS-assisted group to meet quality requirements (P=0.037). Based on the expert ratings of image quality, the PSAIS-assisted training group exhibited superior ability in acquiring standard imaging views compared with the conventional training group in the third (P=0.012) and fourth (P<0.001) c…	Pre-natal ultrasound quality image gathering
31	Influence of artificial intelligence on the diagnostic performance of endoscopists in the assessment of Barrett's esophagus: A tandem randomized and video trial	Meinikheim, M. and Mendel, R. and Palm, C. and Probst, A. and Muzalyova, A. and Scheppach, M.W. and Nagl, S. and Schnoy, E. and Rommele, C. and Schulz, D.A.H. and Schlottmann, J. and Prinz, F. and Rauber, D. and R√ºckert, T. and Matsumura, T. and Fern√°ndez-Esparrach, G. and Parsa, N. and Byrne, M.F. and Messmann, H. and Ebigbo, A.	Real	Prospective	Video review of endoscopies, one group with AI first then without, no statistically significant improvements from this group	Unspecified	22	No: "Without AI, BE experts had an overall sensitivity, specificity, and accuracy of 83.3%, 58.1%, and 71.5%, respectively. With AI, BE nonexperts showed a significant improvement in sensitivity and specificity when videos were assessed a second time with AI (sensitivity 69.8% [95%CI 65.2%–74.2%] to 78.0% [95%CI 74.0%–82.0%]; specificity 67.3% [95%CI 62.5%– 72.2%] to 72.7% [95%CI 68.2%–77.3%]). I…	Bronchoscopy
34	The implementation of computer-aided detection in an initial endoscopy training improves the quality measures of trainees‚Äô future colonoscopies: a retrospective cohort study	Orzeszko, Z. and Gach, T. and Necka, S. and Ochwat, K. and Major, P. and Szura, M.	Real	Retrospective	"a theoretical course, a one-month observership, and supplementary ex-vivo training." After training, all endoscopists were evaluated on their first 1,000 examinations performed without AI enhancement.	Unspecified, but assumed over a period of more than a month (given 1,000 examinations after trianing)	6	No: "AI-trained group had also a significantly improved adenoma detection rate (ADR) by 5.3% (95% CI: 2.9–7.6%) and sessile lesion detection rate (SDR) by 5.4% (95% CI: 3.8–7.0%). AI-assisted training enhanced the detection of nongranular LSTs smaller than 20 mm by 0.2% (95% CI 0.1% to 0.4%) and was identified as a factor of high-quality performance in terms of ADR and SDR (OR 1.27, 95% CI: 1.14–…	Colonoscopy
35	Effect of Deep Learning-Based Artificial Intelligence on Radiologists‚Äô Performance in Identifying Nigrosome 1 Abnormalities on Susceptibility Map-Weighted Imaging	Park, J. and Lim, C.Y. and Won, S.Y. and Na, H.K. and Lee, P.H. and Baek, S.-Y. and Roh, Y.H. and Seong, M. and Sim, Y. and Kim, E.Y. and Kim, S.T. and Sohn, B.	Real	Retrospective	4 radiologists divided into two groups to evaluate SMwI images. One group viewed images w AI then without, while the other group did the opposite. After a 2 month washout period, the groups reversed the order.	2-month washout period	4	No: "Use of AI significantly improved diagnostic performance compared with interpretation without it across three readers, with significant increases in specificity (0.86 vs. 0.94, P = 0.004; 0.91 vs. 0.97, P = 0.024; and 0.90 vs. 0.97, P = 0.012). Inter-reader agreement also improved with AI, as Fleiss’s kappa increased from 0.73 (95% confidence interval [CI]: 0.61–0.84) to 0.87 (95% CI: 0.76–0.…	Cerebral aneurysm detection
44	Assessing the Performance of Artificial Intelligence Assistance for Prostate MRI: A Two-Center Study Involving Radiologists With Different Experience Levels	Sun, Z. and Wang, K. and Gao, G. and Wang, H. and Wu, P. and Li, J. and Zhang, X. and Wang, X.	Real	Retrospective	900 total cases were randomized and divided among 10 sets and given to participants; 45 were viewed with AI assistance and 45 without. Then, after a 4 week washout period, the cases were read again but flipped so that the original cases read with AI were read without and vice versa.	4-week washout period	16	No: "For less-experienced radiologists, AI assistance signiﬁcantly improved lesion-level sensitivity (0.78 vs. 0.88), sextant-level AUC (0.84 vs. 0.93), and patient-level AUC (0.84 vs. 0.89). For experienced radiologists, AI assistance only improved sextant-level AUC (0.82 vs. 0.91). AI assistance signiﬁcantly reduced median reading time (250 s [interquartile range, IQR: 157, 402] vs. 130 s [IQR:…	Prostate MRI review (csPCa detection)
45	A Deep Learning Model Enhances Clinicians' Diagnostic Accuracy to More Than 96% for Anterior Cruciate Ligament Ruptures on Magnetic Resonance Imaging	Wang, D.-Y. and Liu, S.-G. and Ding, J. and Sun, A.-L. and Jiang, D. and Jiang, J. and Zhao, J.-Z. and Chen, D.-S. and Ji, G. and Li, N. and Yuan, H.-S. and Yu, J.-K.	Real	Retrospective	100 MRIs diagnosed with and without AI assistance; 2-hour timeframe for diagnosis, then 4 week washout	10-day washout period	38	No: "The AI assistance signiﬁcantly improved the accuracy of all clinicians, exceeding 96%. Additionally, a notable reduction in diagnostic time was observed. The most signiﬁcant improvements in accuracy and time efﬁciency were observed in the trainee groups, suggesting that AI support is particularly beneﬁcial for clinicians with moderately limited diagnostic expertise."	ACL rupture diagnosis MRI

## Sheet: Copy of Final 60
Article #	title	year	journal	authors	Specialty	AI type	Full text screening notes	Impact (pos., neut., neg.)
1	Artificial Intelligence-Guided Bronchoscopy is Superior to Human Expert Instruction for the Performance of Critical-Care Physicians: A Randomized Controlled Trial	225	Critical Care Medicine	Agbontaen, K.O. and Cold, K.M. and Woods, D. and Grover, V. and Soliman-Aboumarie, H.S. and Kaul, S. and Konge, L. and Singh, S.	Critical Care	unspecificied beyond "Augmented reality" -- likely using computer vision?	AI-guided bronchoscopy (on-screen feedback); better than expert guided	pos.
2	Endoscopist deskilling risk after exposure to artificial intelligence in colonoscopy: a multicentre, observational study	225	The Lancet Gastroenterology and Hepatology	Budzy≈Ñ, K. and Roman¬¥czyk, M. and Kitala, D. and Ko≈Çodziej, P. and Bugajski, M. and Adami, H.O. and Blom, J. and Buszkiewicz, M. and Halvorsen, N. and Hassan, C. and Rom√°nczyk, T. and Holme, √ò. and Jarus, K. and Fielding, S. and Kunar, M. and Pellis√© Urquiza, M. and Pilonis, N. and Kaminski, M.F. and Kalager, M. and Bretthauer, M. and Mori, Y.	Gastroenterology	ENDO-AID CADe (OIP-1, Olympus Medical Systems, Tokyo)	Exposure to AI shown to lead to decrease in Adenoma detection rate	neg.
3	Empowering Radiologists With ChatGPT-4o: Comparative Evaluation of Large Language Models and Radiologists in Cardiac Cases	225	Journal of Thoracic Imaging	Cesur, T. and G√ºne≈ü, Y.C. and √áamur, E. and Da«ßli, M.	Radiology	LLM (GPT-4o)	Use of GPT-4o for cardiac radiology readings; GPT improved diagnostic accuracy for all. General radiologist performed similarly to a cardiac specialist	pos.
4	Large Language Model (LLM)-Predicted and LLM-Assisted Calculation of the Spinal Instability Neoplastic Score (SINS) Improves Clinician Accuracy and Efficiency	225	Cancers	Chan, M.D.Z. and Tjio, C.K.E. and Chan, T.L.Y. and Tan, Y.L. and Chua, A.X.Y. and Loh, S.K.Y. and Leow, G.Z.H. and Gan, M.Y. and Lim, X. and Choo, A.K. and Liu, Y. and Tan, J.W.P. and Teo, E.C. and Yap, Q.V. and Yonghan, T. and Makmur, A. and Kumar, N. and Tan, J.H. and Hallinan, J.T.P.D.	Oncology	LLM	LLM use for spinal instability neoplastic score generation better than not; both autonomously and with physician use - speeds up time and improves ICC.	pos.
5	Artificial Intelligence in the Training of Radiology Residents: a Multicenter Randomized Controlled Trial	225	Journal of Cancer Education	Chen, Y. and Sun, Z. and Lin, W. and Xv, Z. and Su, Q.	Radiology	AmCAD-UT (ultrasound CAD software	Assessed AI-assisted training of radiology residents; specialty training and AI-assisted training groups were better than conventional training (for thyroid nodule detection)	pos.
6	Simulation-based training intervention using artificial intelligence to improve clinical bronchoscopy performance: a pre‚Äìpostintervention study	225	BMJ Open	Cold, K.M. and Arshad, A. and Kildegaard, C. and Laursen, C.B. and Konge, L. and Nielsen, A.B.	Pulmonology	Augmented reality feedback (onscreen annotations)	No statistical difference between AI-simulation system training in bronchoscopists	neut.
7	Mastery Learning Guided by Artificial Intelligence Is Superior to Directed Self-Regulated Learning in Flexible Bronchoscopy Training: An RCT	225	Respiration	Cold, K.M. and Wei, W. and Agbontaen, K.O. and Singh, S. and Konge, L.	Pulmonology	computer vision (of some sort); Ambu BPS, Prototype version AmbuBPStrainingGUIDEv...1	AI guided bronchoscopy improved speed of novice trainees	pos.
8	A quality assessment tool for focused abdominal sonography for trauma examinations using artificial intelligence	225	Journal of Trauma and Acute Care Surgery	Cull, J. and Morrow, D. and Manasco, C. and Vaughan, A. and Eicken, J. and Smith, H.		deep learning (CNN) computer vision
9	Ultrasound S-detect system can improve diagnostic performance of less experienced radiologists in differentiating breast masses: a retrospective dual-centre study	225	British Journal of Radiology	Du, L. and Liu, H. and Cai, M. and Pan, J. and Zha, H. and Nie, C. and Lin, M. and Li, C. and Zong, M. and Zhang, B.	Radiology	Deep learning algorithm (S-detect)	AI S-detect system improved breast mass diagnosis; improvements seen at all experience levels, but less experienced radiologists saw better improvement with system use	pos.
1	External validation of a motion capture-based surgical skill assessment system in laparoscopic simulation training environments	225	Surgical Endoscopy	Ebina et al.	Surgery	support vector machine
11	Human-AI collaboration for ultrasound diagnosis of thyroid nodules: a clinical trial	225	European Archives of Oto-Rhino-Laryngology	Edstr√∂m, A.B. and Makouei, F. and Wennervaldt, K. and Lomholt, A.F. and Kaltoft, M. and Melchiors, J. and Hvilsom, G.B. and Bech, M. and Tolsgaard, M. and Todsen, T.	Otorhinolaryngology	Deep learning algorithm (S-detect)	AI S-detect system use saw no significant difference across experience levels (medical students, novice physicians, experienced physicians)	neutr.
12	The role of artificial intelligence in surgeon-performed ultrasonographic evaluation of cytologically indeterminate thyroid nodules	225	American Journal of Surgery	Fung, M.H.M. and Ng, W.I. and Lee, H.E. and Chan, T.H. and Leung, S.T.K. and Luk, Y. and Lang, B.H.H.	Surgery	AI-SONIC	AI assisted analysis of surgeon-performed US clips improved the diagnostic accuracy of medical students and residents to levels comparable with specialists; specialist performance unchanged	pos.
13	Professional Expertise Practice Adaptation and Sense of Agency During AI Implementation in Radiology	225	Journal of Applied Behavioral Science	Galsgaard, A. and Holten, A.-L. and Boesen, M. and Muller, F.C.	Radiology
14	Combining artificial intelligence and human expertise for more accurate dermoscopic melanoma diagnosis: A 2-session retrospective reader study	224	Journal of the American Academy of Dermatology	Giulini et al.	Dermatology	CNN	Use of CNN for dermatological image diagnosis showed statistically signifcant improvements across all physicians	pos.
15	Large Language Model Influence on Diagnostic Reasoning: A Randomized Clinical Trial	224	JAMA Network Open	Goh, E. and Gallo, R. and Hom, J. and Strong, E. and Weng, Y. and Kerman, H. and Cool, J.A. and Kanjee, Z. and Parsons, A.S. and Ahuja, N. and Horvitz, E. and Yang, D. and Milstein, A. and Olson, A.P.J. and Rodman, A. and Chen, J.H.	Family med; Internal Med; Emergency Med	LLM (GPT-4)	No statistically significant improvement found for physicians utilising LLMs vs. those using conventional resources for diagnosis	neutr.
16	Influence of AI Decision Support on Radiologists‚Äô Performance and Visual Search in Screening Mammography	225	Radiology	Gommers, J.J.J. and Verboom, S.D. and Duvivier, K.M. and Rooden, C.J.V. and Raamt, A.F.V. and Houwers, J.B. and Naafs, D.B. and Duijm, L.E.M. and Eckstein, M.P. and Abbey, C.K. and Broeders, M.J.M. and Sechopoulos, I.	Radiology	Deep CNNs (Transpara)	AI support system improved radiologists' breast cancer detection accuracy and improved eye fixation time on suspicious areas	pos.
17	Artificial intelligence stenosis diagnosis in coronary CTA: effect on the performance and consistency of readers with less cardiovascular experience	222	BMC Medical Imaging	Han, X. and Luo, N. and Xu, L. and Cao, J. and Guo, N. and He, Y. and Hong, M. and Jia, X. and Wang, Z. and Yang, Z.	Radiology	“CoronaryDoc clinical decision Support Platform V1.” from Shukun (Beijing) Technology Co., Ltd.	AI-assisted cardiac CT improved diagnosis of coronary stenosis for less experienced readers	pos.
18	AI-assisted chest radiograph interpretation enhances diagnostic confidence and standardizes diagnostic accuracy across radiologists: A multi-reader study	226	Clinical Imaging	Huang, H.-Y. and Huang, Y.-H. and Lin, C.-H. and Tao, W.-T. and Liao, W.-C. and Yu, S. and Mo, H.-C. and Feng, W. and Hsu, Y.-T. and Wang, J.-C. and Ko, K.-H.	Radiology	Deep learning image processor	AI-assisted CAD system improved diagnostic performance for chest radiographs; greatest gains were seen in less experienced physicians	pos.
19	Impact of an artificial intelligence decision support system among radiologists with different levels of experience in breast ultrasound: A prospective study in a tertiary center	225	European Journal of Radiology	Irmici, G. and Cozzi, A. and Depretto, C. and Della Pepa, G. and Ancona, E. and Bonanomi, A. and Ballerini, D. and D‚ÄôAscoli, E. and de Berardinis, C. and Marziali, S. and Giambersio, E. and Scaperrotta, G.	Radiology	Koios DS	AI assisted US support system (Koios DS) improved diagnostic accuracy across 3 radiologists, with the least experienced radiologist having the greatest increase in diagnostic accuracy	pos.
2	Enhancing puncture skills training with generative AI and digital technologies: a parallel cohort study	224	BMC Medical Education	Ji, Z. and Jiang, Y. and Sun, H. and Qiu, B. and Chen, Y. and Li, M. and Fan, J. and Wang, J.	Radiology; Anesthesiology; Oncology?	LLM (ChatGPT, unspecified version)	CT-guided puncture training w/ one group being assisted by ChatGPT (tailored teaching content). GPT group increased theoretical knowledge; overall, GPT group performed better than traditional training.	pos.
21	The impact of deep learning on diagnostic performance in the differentiation of benign and malignant thyroid nodules	225	Medical Ultrasonography	Kaba, E. and Solak, M. and Varlƒ±k, A.T. and √áubuk√ßu, Y. and Sagir, L. and Sunnetci, K.M. and Alkan, A. and G√ºndoƒüdu, H. and Beyazal √áeliker, F.B. and Beyazal, M.	Radiology	AlexNet Deep Learning architecture	DL US assistance improves diagnostic accuracy, more so for less experienced radiologists	pos.
22	Video-Based Performance Analysis in Pituitary Surgery - Part 2: Artificial Intelligence Assisted Surgical Coaching	224	World Neurosurgery	Khan, D.Z. and Newall, N. and Koh, C.H. and Das, A. and Aapan, S. and Layard-Horsfall, H. and Baldeweg, S.E. and Bano, S. and Borg, A. and Chari, A. and Dorward, N.L. and Elserius, A. and Giannis, T. and Jain, A. and Stoyanov, D. and Marcus, H.J.	Neurosurgery	unspecified software for video analysis	AI surgical coaching program improved surgical performance during coaching period	pos.
23	Enhancing diagnostic accuracy of thyroid nodules: integrating self-learning and artificial intelligence in clinical training	225	Endocrine	Kim, D. and Hwang, Y.-A. and Kim, Y. and Lee, H.S. and Lee, E. and Lee, H. and Yoon, J.H. and Park, V.Y. and Rho, M. and Yoon, J. and Lee, S.E. and Kwak, J.Y.	Internal Medicine; Radiology	SEveRance Artificial Intelligence (AI-CAD)	Noted improvement in diagnostic performance across all experience levels with the use of AI-CAD for thyroid nodule US	pos.
24	An artificial intelligence-based nerve recognition model is useful as surgical support technology and as an educational tool in laparoscopic and robot-assisted rectal cancer surgery	224	Surgical Endoscopy	Kinoshita, K. and Maruyama, T. and Kobayashi, N. and Imanishi, S. and Maruyama, M. and Ohira, G. and Endo, S. and Tochigi, T. and Kinoshita, M. and Fukui, Y. and Kumazu, Y. and Kita, J. and Shinohara, H. and Matsubara, H.	Surgery (Gastroenterology)	Deep Learning (U-Net)	Nerve recognition improved across experience levels with AI recognition videos; medical students showed greater improvements	pos.
25	Evaluation of physician performance using a concurrent-read artificial intelligence system to support breast ultrasound interpretation	222	Breast	Lai, Y.-C. and Chen, H.-H. and Hsu, J.-F. and Hong, Y.-J. and Chiu, T.-T. and Chiou, H.-J.	Radiology	Deep Learning (BU-CAD)	Diagnostic performance and time spent improved with AI system use	pos.
26	Impact of an AI software on the diagnostic performance and reading time for the detection of cerebral aneurysms on time of flight MR-angiography	224	Neuroradiology	Lehnen, N.C. and Schievelkamp, A.-H. and Gronemann, C. and Haase, R. and Krause, I. and Gansen, M. and Fleckenstein, T. and Dorn, F. and Radbruch, A. and Paech, D.	Neuroradiology	CNN (mdbrain)	Improved specifity and reading times across experience levels for aneurysm detection w AI software	pos.
27	Enhancing trainee performance in obstetric ultrasound through an artificial intelligence system: randomized controlled trial	224	Ultrasound in Obstetrics and Gynecology	Lei, T. and Zheng, Q. and Feng, J. and Zhang, L. and Zhou, Q. and He, M. and Lin, M. and Xie, H.N.	OBGYN	unspecified	Inexperienced obstetrics residence improved prenatal obstetric US skills with AI assistance; gap between inexperienced and experts diminished with AI assistance	pos.
28	Enhancing sonologist examination performance with large language models: an analytical study of ChatGPT-4 and Claude 3	225	Medical Ultrasonography	Li, X. and Chen, Z. and Xie, T. and Liang, J. and Chen, F.	Sonology	LLMs	LLMs may improve basic and professional knowledge of sonologists	pos.
29	Computed tomography (CT) structured reporting generation based on the intelligent assisted diagnosis system for rectal cancer staging and evaluation of its clinical application	225	Clinical Radiology	Liu, K. and Qiu, C. and Xia, Y. and Li, C. and Zhang, H. and Guo, W. and Wang, W. and Wan, S. and Zou, B.	Emergency(?)	YOLOs(?) CNN and ImageNet	Primarily about model training, but part 2 used first year physicians for intubation training; those with AI laryngoscope training had superior performance and reduced time compared to normal video laryngoscope training.	pos.
3	Application of an artificial intelligence-based airway identification system in tracheal intubation	226	BMC Anesthesiology	Liu, K. and Tang, H. and Wang, Z.	Radiology	CNN	AI-assisted junior radiologists had outcomes comparable to senior radiologists	pos.
31	Improving the Real-time Classification of Disease Severity in Ulcerative Colitis: Artificial Intelligence as the Trigger for a Second Opinion	225	American Journal of Gastroenterology	Lo, B. and M√∏ller, B. and Igel, C. and Wildt, S. and Vind, I. and Bendtsen, F. and Burisch, J. and Ibragimov, B.	Gastroenterology	CNN	Endoscopic classification CNN improved non-expert performance for endoscopy and classification of ulcerative colitis	pos.
32	Evaluating the impact of AI assistance on decision-making in emergency doctors interpreting chest X-rays: a multi-reader multi-case study	225	Emergency Medicine Journal	Lyell, D. and Dinh, M. and Gillett, M. and Abraham, N. and Symes, E.R. and Susanto, A.P. and Chakar, B.A. and Seimon, R.V. and Coiera, E. and Magrabi, F.	Emergency	Annalise Enterprise CXR tool	AI-assited chest Xray interpretation improved diagnosis with largest benefits seen in senior residents (interesting)	pos.
33	Leveraging the Capabilities of AI: Novice Neurology-Trained Operators Performing Cardiac POCUS in Patients with Acute Brain Injury	224	Neurocritical Care	Mears, J. and Kaleem, S. and Panchamia, R. and Kamel, H. and Tam, C. and Thalappillil, R. and Murthy, S. and Merkler, A.E. and Zhang, C. and Ch'ang, J.H.	Neurology	DL US guidance	Neurology providers w minimal to no cardiac POCUS training were able to obtain diagnostic-quality cardiac images with DL guidance	pos.
34	Influence of artificial intelligence on the diagnostic performance of endoscopists in the assessment of Barrett's esophagus: A tandem randomized and video trial	224	Endoscopy	Meinikheim, M. and Mendel, R. and Palm, C. and Probst, A. and Muzalyova, A. and Scheppach, M.W. and Nagl, S. and Schnoy, E. and Rommele, C. and Schulz, D.A.H. and Schlottmann, J. and Prinz, F. and Rauber, D. and R√ºckert, T. and Matsumura, T. and Fern√°ndez-Esparrach, G. and Parsa, N. and Byrne, M.F. and Messmann, H. and Ebigbo, A.	Gastroenterology	Deep learning (DeepLabV3)	Non-expert performance of BE recognition improved with AI assistance	pos.
35	Artificial Intelligence Improves the Ability of Physicians to Identify Prostate Cancer Extent	224	Journal of Urology	Mota, S.M. and Priester, A. and Shubert, J. and Bong, J. and Sayre, J. and Berry-Pusey, B. and Brisbane, W.G. and Natarajan, S.	Urology	Unfold AI	AI-assisted cancer contouring system was significantly better than physicians alone	pos.
36	Evaluation of the impact of artificial intelligence-assisted image interpretation on the diagnostic performance of clinicians in identifying pneumothoraces on plain chest X-ray: a multi-case multi-reader study	224	Emergency Medicine Journal	Novak, A. and Ather, S. and Gill, A. and Aylward, P. and Maskell, G. and Cowell, G.W. and Morgado, A.T.E. and Duggan, T. and Keevill, M. and Gamble, O. and Akrama, O. and Belcher, E. and Taberham, R. and Hallifax, R. and Bahra, J. and Banerji, A. and Bailey, J. and James, A. and Ansaripour, A. and Spence, N. and Wrightson, J. and Jarral, W. and Barry, S. and Bhatti, S. and Astley, K. and Shadmaan…	Emergency	GE PTX algorithm	Reader sensitivity for pneumothoracies increased with AI assistance; largest increase came from junior readers (less experienced)	pos.
37	The implementation of computer-aided detection in an initial endoscopy training improves the quality measures of trainees‚Äô future colonoscopies: a retrospective cohort study	225	Surgical Endoscopy	Orzeszko, Z. and Gach, T. and Necka, S. and Ochwat, K. and Major, P. and Szura, M.	Surgery (gastroenterology)	ENDO-AID OIP-1	AI-trained (CADe) endoscopists showed significant improvements in surgery than those trained conventionally	pos.
38	Effect of Deep Learning-Based Artificial Intelligence on Radiologists‚Äô Performance in Identifying Nigrosome 1 Abnormalities on Susceptibility Map-Weighted Imaging	225	Korean Journal of Radiology	Park, J. and Lim, C.Y. and Won, S.Y. and Na, H.K. and Lee, P.H. and Baek, S.-Y. and Roh, Y.H. and Seong, M. and Sim, Y. and Kim, E.Y. and Kim, S.T. and Sohn, B.	Radiology	Deep learning (YOLOX and SparseInst)	AI assistance signifcantly enhanced diagnostic performance; less experienced radiologists had greater improvements	pos.
39	Artificial Intelligence-Based Diagnostic Support System for Patent Ductus Arteriosus in Premature Infants	224	Journal of Clinical Medicine	Park, S. and Moon, J. and Eun, H. and Hong, J.-H. and Lee, K.	Pediatrics (Neonatology)	unspecified	PDA diagnosis was significantly improved with developed AI model	pos.
4	Care to Explain? AI Explanation Types Differentially Impact Chest Radiograph Diagnostic Performance and Physician Trust in AI	224	Radiology	Prinster, D. and Mahmood, A. and Saria, S. and Jeudy, J. and Lin, C.T. and Yi, P.H. and Huang, C.-M.	Radiology	DL (ChestAId)	local AI explanations increased diagnostic accuracy	pos./neut.
41	Artificial Intelligence for Real-Time Prediction of the Histology of Colorectal Polyps by General Endoscopists	224	Annals of Internal Medicine	Rex, D.K. and Bhavsar-Burke, I. and Buckles, D. and Burton, J. and Cartee, A. and Comar, K. and Edwards, A. and Fennimore, B. and Fischer, M. and Gerich, M. and Gilmore, A. and Hamdeh, S. and Hoffman, J. and Ibach, M. and Jackson, M. and James-Stevenson, T. and Kaltenbach, T. and Kaplan, J. and Kapur, S. and Kohm, D. and Kriss, M. and Kundumadam, S. and Kyanam-Kabir-Baig, K.R. and Menard-Katcher,…	Gastroenterology	CADx system (Olympus corporation)	Real time CADx detection of polyps had minimal increase in specificity and no incease in sensitivity	neutr./neg.
42	Nonradiology Health Care Professionals Significantly Benefit From AI Assistance in Emergency-Related Chest Radiography Interpretation	224	Chest	Rudolph, J. and Huemmer, C. and Preuhs, A. and Buizza, G. and Hoppe, B.F. and Dinkel, J. and Koliogiannis, V. and Fink, N. and Goller, S.S. and Schwarze, V. and Mansour, N. and Schmidt, V.F. and Fischer, M. and J√∂rgens, M. and Ben Khaled, N. and Liebig, T. and Ricke, J. and Rueckel, J. and Sabel, B.O.	Radiology; Emergency	unspecified	Non-radiology residents significantly improved CXR reading with AI assistance	pos.
43	Artificial intelligence-enhanced navigation for nerve recognition and surgical education in laparoscopic colorectal surgery	225	Surgical Endoscopy	Ryu, S. and Imaizumi, Y. and Goto, K. and Iwauchi, S. and Kobayashi, T. and Ito, R. and Nakabayashi, Y.	Surgery (GE)	Eureka AI system	Variable recognition rates among trainees with AI navigation	neutr.
44	Artificial Intelligence-Powered Clinical Decision Support and Simulation Platform for Radiology Trainee Education	223	Journal of Digital Imaging	Shah, C. and Davtyan, K. and Nasrallah, I. and Bryan, R.N. and Mohan, S.	Radiology	Galileo CDS	AI-assisted MRI readings showed no significant difference in trainees	neutr.
45	AI-augmented clinical decision in paediatric appendicitis: can an AI-generated model improve trainees‚Äô diagnostic capability?	224	European Journal of Pediatrics	Shikha, A. and Kasem, A. and Han, W.S.P. and Wong, J.H.L.	Pediatrics	AiPAD (Decision tree)	Trainee diagnostic accuracy improved with AI-assistance, rivaling supervisors	pos.
46	The virtual reference radiologist: comprehensive AI assistance for clinical image reading and interpretation	224	European Radiology	Siepmann, R. and Huppertz, M. and Rastkhiz, A. and Reen, M. and Corban, E. and Schmidt, C. and Wilke, S. and Schad, P. and Yuksel, C. and Kuhl, C. and Truhn, D. and Nebelung, S.	Radiology	LLM (GPT-4)	Slight diagnostic improvement w GPT assistance; improved confidence w GPT use	pos.
47	Assessing the Performance of Artificial Intelligence Assistance for Prostate MRI: A Two-Center Study Involving Radiologists With Different Experience Levels	225	Journal of Magnetic Resonance Imaging	Sun, Z. and Wang, K. and Gao, G. and Wang, H. and Wu, P. and Li, J. and Zhang, X. and Wang, X.	Radiology	unspecified	AI assistance significantly improved less-experienced radiologists' diagnostic accuracy	pos.
48	A Deep Learning Model Enhances Clinicians' Diagnostic Accuracy to More Than 96% for Anterior Cruciate Ligament Ruptures on Magnetic Resonance Imaging	224	Arthroscopy - Journal of Arthroscopic and Related Surgery	Wang, D.-Y. and Liu, S.-G. and Ding, J. and Sun, A.-L. and Jiang, D. and Jiang, J. and Zhao, J.-Z. and Chen, D.-S. and Ji, G. and Li, N. and Yuan, H.-S. and Yu, J.-K.	Radiology; Sports Med	DL (developed model)	AI-assistance significantly improved diagnostic accuracy, especially for less experienced clinicians	pos.
49	Comparative analysis of traditional and integrated approaches to radiology training for residents	225	BMC Medical Education	Wang, J. and Wang, L. and Yang, Z. and Zou, Q. and Liu, Y.	Radiology	various, unspecified	AI-integrated training modules improved radiology residents theoretical knowledge, compared to traditional training modules	pos.
5	Using an artificial intelligence software improves emergency medicine physician intracranial haemorrhage detection to radiologist levels	224	Emergency Medicine Journal	Warman, P. and Warman, A. and Warman, R. and Degnan, A. and Blickman, J. and Smith, D. and McHale, P. and Coburn, Z. and McCormick, S. and Chowdhary, V. and Dash, D. and Sangal, R. and Vadhan, J. and Bueso, T. and Windisch, T. and Neves, G.	Emergency	(Caire ICH software)	AI-assisted CT scan software significantly improved diagnostic accuracy of ED physicians	pos.
51	Impact of an AI-based laparoscopic cholecystectomy coaching program on the surgical performance: a randomized controlled trial	224	International Journal of Surgery	Wu, S. and Tang, M. and Liu, J. and Qin, D. and Wang, Y. and Zhai, S. and Bi, E. and Li, Y. and Wang, C. and Xiong, Y. and Li, G. and Gao, F. and Cai, Y. and Gao, P. and Wu, Z. and Cai, H. and Liu, J. and Chen, Y. and Fang, C. and Yao, L. and Jiang, J. and Peng, B. and Wu, H. and Li, A. and Wang, X.	Surgery	SurgSmart	AI-assisted LC coaching improved surgical perfomance	pos.
52	A large language model improves clinicians‚Äô diagnostic performance in complex critical illness cases	225	Critical Care	Wu, X. and Huang, Y. and He, Q.	Critical Care	LLM (DeepSeek R1)	AI-assisted groups showed significantly increased diagnostic accuracy	pos.
53	A deep learning algorithm that aids visualization of femoral neck fractures and improves physician training	224	Injury	Xing, P. and Zhang, L. and Wang, T. and Wang, L. and Xing, W. and Wang, W.	Orthopedics	R-CNN (DenseNet-121)	AI-assisted fracture detection significantly improved diagnostic accuracy	pos.
54	Development and Validation an AI Model to Improve the Diagnosis of Deep Infiltrating Endometriosis for Junior Sonologists	225	Ultrasound in Medicine and Biology	Xu, J. and Zhang, A. and Zheng, Z. and Cao, J. and Zhang, X.	Sonology/Gynecology	DL (YOLO)	Diagnostic performance improved with AI-assisted US	pos.
55	Impact of an artificial intelligence-aided endoscopic diagnosis system on improving endoscopy quality for trainees in colonoscopy: Prospective, randomized, multicenter study	224	Digestive Endoscopy	Yamaguchi, D. and Shimoda, R. and Miyahara, K. and Yukimoto, T. and Sakata, Y. and Takamori, A. and Mizuta, Y. and Fujimura, Y. and Inoue, S. and Tomonaga, M. and Ogino, Y. and Eguchi, K. and Ikeda, K. and Tanaka, Y. and Takedomi, H. and Hidaka, H. and Akutagawa, T. and Tsuruoka, N. and Noda, T. and Tsunada, S. and Esaki, M.	Gastroenterology	CAD-EYE	No significant improvements between AI-assisted and non-assisted physicians; but decreased miss rates with AI-assistance	neutr./pos.
56	Accuracy of radiologists and radiology residents in detection of paediatric appendicular fractures with and without artificial intelligence	224	BMJ Health and Care Informatics	Yogendra, P.M. and Goh, A.G.W. and Yee, S.Y. and Jawan, F. and Koh, K.K.N. and Tan, T.S.E. and Woon, T.K. and Yeap, P.M. and Tan, M.O.	Radiology	RBfracture (commercial)	AI-assisted diagnosis significantly better compared to non-assisted	pos.
57	Deep Learning-Assisted Quantitative Measurement of Thoracolumbar Fracture Features on Lateral Radiographs	224	Neurospine	Yuh, W.T. and Khil, E.K. and Yoon, Y.S. and Kim, B. and Yoon, H. and Lim, J. and Lee, K.Y. and Yoo, Y.S. and An, K.D.	Neurosurgery	Mask Region-Based Convolutional Neural Networks	AI-assisted measurements improved performance, especially for novices	pos.
58	Artificial intelligence improves resident detection of pediatric and young adult upper extremity fractures	224	Skeletal Radiology	Zech, J.R. and Ezuma, C.O. and Patel, S. and Edwards, C.R. and Posner, R. and Hannon, E. and Williams, F. and Lala, S.V. and Ahmad, Z.Y. and Moy, M.P. and Wong, T.T.	Radiology; Pediatrics	Faster R-CNN X11-FPN model	AI-assistance improved diagnostic accuracy for less experienced physicians	pos.
59	A study on the improvement in the ability of endoscopists to diagnose gastric neoplasms using an artificial intelligence system	224	Frontiers in Medicine	Zhang, B. and Zhang, W. and Yao, H. and Qiao, J. and Zhang, H. and Song, Y.	Gastroenterology	Deep learning	AI-assistance significantly improved intermediate physicians, more so than experts	pos.
6	Enhancing Radiologists‚Äô Performance in Detecting Cerebral Aneurysms Using a Deep Learning Model: A Multicenter Study	225	Academic Radiology	Zhuo, L. and Zhang, Y. and Song, Z. and Mo, Z. and Xing, L. and Zhu, F. and Meng, H. and Chen, L. and Qu, G. and Jiang, P. and Wang, Q. and Cheng, R. and Mi, X. and Liu, L. and Hong, N. and Cao, X. and Wu, D. and Wang, J. and Yin, X.	Radiology	Deep Learning	AI-assistance reduced interpretation time and increased diagnostic accuracy, more so in junior radiologists than senior rads.	pos.
57 total for review

## Sheet: Copy of Original 75 for full te
Article #	Exclusion	title	year	journal	authors	Specialty	AI type	Full text screening notes	Impact (pos., neut., neg.)
1		Artificial Intelligence-Guided Bronchoscopy is Superior to Human Expert Instruction for the Performance of Critical-Care Physicians: A Randomized Controlled Trial	225	Critical Care Medicine	Agbontaen, K.O. and Cold, K.M. and Woods, D. and Grover, V. and Soliman-Aboumarie, H.S. and Kaul, S. and Konge, L. and Singh, S.	Critical Care	unspecificied beyond "Augmented reality" -- likely using computer vision?	AI-guided bronchoscopy (on-screen feedback); better than expert guided	pos.
2	Non-physicians (medical students)	Enhancing clinical skills in pediatric trainees: a comparative study of ChatGPT-assisted and traditional teaching methods	224	BMC Medical Education	Ba, H. and Zhang, L. and Yi, Z.	Pediatrics	LLM (ChatGPT 4.)	"pediatric trainees" (unsure if medical students)
3	No comparison	Enhancing radiology training with GPT-4: Pilot analysis of automated feedback in trainee preliminary reports	225	Current Problems in Diagnostic Radiology	Bala, W. and Li, H. and Moon, J. and Trivedi, H. and Gichoya, J. and Balthazar, P.	Radiology	LLM (GPT-4)	Use of LLMs to review radiology reports
4		Endoscopist deskilling risk after exposure to artificial intelligence in colonoscopy: a multicentre, observational study	225	The Lancet Gastroenterology and Hepatology	Budzy≈Ñ, K. and Roman¬¥czyk, M. and Kitala, D. and Ko≈Çodziej, P. and Bugajski, M. and Adami, H.O. and Blom, J. and Buszkiewicz, M. and Halvorsen, N. and Hassan, C. and Rom√°nczyk, T. and Holme, √ò. and Jarus, K. and Fielding, S. and Kunar, M. and Pellis√© Urquiza, M. and Pilonis, N. and Kaminski, M.F. and Kalager, M. and Bretthauer, M. and Mori, Y.	Gastroenterology	ENDO-AID CADe (OIP-1, Olympus Medical Systems, Tokyo)	Exposure to AI shown to lead to decrease in Adenoma detection rate	neg.
5		Empowering Radiologists With ChatGPT-4o: Comparative Evaluation of Large Language Models and Radiologists in Cardiac Cases	225	Journal of Thoracic Imaging	Cesur, T. and G√ºne≈ü, Y.C. and √áamur, E. and Da«ßli, M.
6		Large Language Model (LLM)-Predicted and LLM-Assisted Calculation of the Spinal Instability Neoplastic Score (SINS) Improves Clinician Accuracy and Efficiency	225	Cancers	Chan, M.D.Z. and Tjio, C.K.E. and Chan, T.L.Y. and Tan, Y.L. and Chua, A.X.Y. and Loh, S.K.Y. and Leow, G.Z.H. and Gan, M.Y. and Lim, X. and Choo, A.K. and Liu, Y. and Tan, J.W.P. and Teo, E.C. and Yap, Q.V. and Yonghan, T. and Makmur, A. and Kumar, N. and Tan, J.H. and Hallinan, J.T.P.D.	Oncology	LLM	LLM use for spinal instability neoplastic score generation better than not; both autonomously and with physician use - speeds up time and improves ICC.	pos.
7		Artificial Intelligence in the Training of Radiology Residents: a Multicenter Randomized Controlled Trial	225	Journal of Cancer Education	Chen, Y. and Sun, Z. and Lin, W. and Xv, Z. and Su, Q.	Radiology	AmCAD-UT (ultrasound CAD software	Assessed AI-assisted training of radiology residents; specialty training and AI-assisted training groups were better than conventional training (for thyroid nodule detection)	pos.
8		Simulation-based training intervention using artificial intelligence to improve clinical bronchoscopy performance: a pre‚Äìpostintervention study	225	BMJ Open	Cold, K.M. and Arshad, A. and Kildegaard, C. and Laursen, C.B. and Konge, L. and Nielsen, A.B.	Pulmonology	Augmented reality feedback (onscreen annotations)	No statistical difference between AI-simulation system training in bronchoscopists	neut.
9		Mastery Learning Guided by Artificial Intelligence Is Superior to Directed Self-Regulated Learning in Flexible Bronchoscopy Training: An RCT	225	Respiration	Cold, K.M. and Wei, W. and Agbontaen, K.O. and Singh, S. and Konge, L.
1		A quality assessment tool for focused abdominal sonography for trauma examinations using artificial intelligence	225	Journal of Trauma and Acute Care Surgery	Cull, J. and Morrow, D. and Manasco, C. and Vaughan, A. and Eicken, J. and Smith, H.
11	No comparison; efficacy	AI in obstetrics: Evaluating residents‚Äô capabilities and interaction strategies with ChatGPT	224	European Journal of Obstetrics and Gynecology and Reproductive Biology	Desseauve, D. and Lescar, R. and de la Fourniere, B. and Ceccaldi, P.-F. and Dziadzko, M.	Obstetrics	LLM (ChatGPT)
12		Ultrasound S-detect system can improve diagnostic performance of less experienced radiologists in differentiating breast masses: a retrospective dual-centre study	225	British Journal of Radiology	Du, L. and Liu, H. and Cai, M. and Pan, J. and Zha, H. and Nie, C. and Lin, M. and Li, C. and Zong, M. and Zhang, B.	Radiology	Deep learning algorithm (S-detect)	AI S-detect system improved breast mass diagnosis; improvements seen at all experience levels, but less experienced radiologists saw better improvement with system use	pos.
13		External validation of a motion capture-based surgical skill assessment system in laparoscopic simulation training environments	225	Surgical Endoscopy	Ebina et al.
14	No comparison	Advancing a Hybrid Decision-Making Model in Anesthesiology: Applications of Artificial Intelligence in the Perioperative Setting	226	Healthcare (Switzerland)	Duarte-Medrano, G. and Nu√±o-L√°mbarri, N. and Patern√≤, D.S. and La Via, L. and Tutino, S. and Dominguez-Cherit, G. and Sorbello, M.	Anesthesiology
15		Human-AI collaboration for ultrasound diagnosis of thyroid nodules: a clinical trial	225	European Archives of Oto-Rhino-Laryngology	Edstr√∂m, A.B. and Makouei, F. and Wennervaldt, K. and Lomholt, A.F. and Kaltoft, M. and Melchiors, J. and Hvilsom, G.B. and Bech, M. and Tolsgaard, M. and Todsen, T.	Otorhinolaryngology	Deep learning algorithm (S-detect)	AI S-detect system use saw no significant difference across experience levels (medical students, novice physicians, experienced physicians)	neutr.
16		The role of artificial intelligence in surgeon-performed ultrasonographic evaluation of cytologically indeterminate thyroid nodules	225	American Journal of Surgery	Fung, M.H.M. and Ng, W.I. and Lee, H.E. and Chan, T.H. and Leung, S.T.K. and Luk, Y. and Lang, B.H.H.	Surgery	AI-SONIC	AI assisted analysis of surgeon-performed US clips improved the diagnostic accuracy of medical students and residents to levels comparable with specialists; specialist performance unchanged	pos.
17		Professional Expertise Practice Adaptation and Sense of Agency During AI Implementation in Radiology	225	Journal of Applied Behavioral Science	Galsgaard, A. and Holten, A.-L. and Boesen, M. and Muller, F.C.
18		Combining artificial intelligence and human expertise for more accurate dermoscopic melanoma diagnosis: A 2-session retrospective reader study	224	Journal of the American Academy of Dermatology	Giulini et al.
19	Effifcacy; no comparison	Artificial Intelligence-Based Stethoscope for the Diagnosis of Aortic Stenosis	222	American Journal of Medicine	Ghanayim, T. and Lupu, L. and Naveh, S. and Bachner-Hinenzon, N. and Adler, D. and Adawi, S. and Banai, S. and Shiran, A.	Cardiology
2	No comparison	Three versions of an atopic dermatitis case report written by humans, artificial intelligence, or both: Identification of authorship and preferences	225	Journal of Allergy and Clinical Immunology: Global	Giavina-Bianchi, M. and D'adario, A. and Giavina Bianchi, P. and Machado, B.S.
21		Large Language Model Influence on Diagnostic Reasoning: A Randomized Clinical Trial	224	JAMA Network Open	Goh, E. and Gallo, R. and Hom, J. and Strong, E. and Weng, Y. and Kerman, H. and Cool, J.A. and Kanjee, Z. and Parsons, A.S. and Ahuja, N. and Horvitz, E. and Yang, D. and Milstein, A. and Olson, A.P.J. and Rodman, A. and Chen, J.H.	Family med; Internal Med; Emergency Med	LLM (GPT-4)	No statistically significant improvement found for physicians utilising LLMs vs. those using conventional resources for diagnosis	neutr.
22		Influence of AI Decision Support on Radiologists‚Äô Performance and Visual Search in Screening Mammography	225	Radiology	Gommers, J.J.J. and Verboom, S.D. and Duvivier, K.M. and Rooden, C.J.V. and Raamt, A.F.V. and Houwers, J.B. and Naafs, D.B. and Duijm, L.E.M. and Eckstein, M.P. and Abbey, C.K. and Broeders, M.J.M. and Sechopoulos, I.
23		Artificial intelligence stenosis diagnosis in coronary CTA: effect on the performance and consistency of readers with less cardiovascular experience	222	BMC Medical Imaging	Han, X. and Luo, N. and Xu, L. and Cao, J. and Guo, N. and He, Y. and Hong, M. and Jia, X. and Wang, Z. and Yang, Z.	Radiology	“CoronaryDoc clinical decision Support Platform V1.” from Shukun (Beijing) Technology Co., Ltd.	AI-assisted cardiac CT improved diagnosis of coronary stenosis for less experienced readers	pos.
24	No comparison	Artificial Intelligence in Digestive Endoscopy Training‚ÄîThe Past, Present, and Future	226	Digestive Endoscopy	Ho, J.C.L. and Qian, Z. and Lau, L.H.S. and Yip, H.-C. and Chiu, P.W.Y.	Gastroenterology
25	No comparison	The performance of sonographic antenatal birth weight assessment assisted with artificial intelligence compared to that of manual examiners at term	225	Archives of Gynecology and Obstetrics	Horky, A. and Wasenitz, M. and Iacovella, C. and Bahlmann, F. and Al Naimi, A.	OBGYN
26		AI-assisted chest radiograph interpretation enhances diagnostic confidence and standardizes diagnostic accuracy across radiologists: A multi-reader study	226	Clinical Imaging	Huang, H.-Y. and Huang, Y.-H. and Lin, C.-H. and Tao, W.-T. and Liao, W.-C. and Yu, S. and Mo, H.-C. and Feng, W. and Hsu, Y.-T. and Wang, J.-C. and Ko, K.-H.	Radiology	Deep learning image processor	AI-assisted CAD system improved diagnostic performance for chest radiographs; greatest gains were seen in less experienced physicians	pos.
27		Impact of an artificial intelligence decision support system among radiologists with different levels of experience in breast ultrasound: A prospective study in a tertiary center	225	European Journal of Radiology	Irmici, G. and Cozzi, A. and Depretto, C. and Della Pepa, G. and Ancona, E. and Bonanomi, A. and Ballerini, D. and D‚ÄôAscoli, E. and de Berardinis, C. and Marziali, S. and Giambersio, E. and Scaperrotta, G.	Radiology	Koios DS	AI assisted US support system (Koios DS) improved diagnostic accuracy across 3 radiologists, with the least experienced radiologist having the greatest increase in diagnostic accuracy	pos.
28		Enhancing puncture skills training with generative AI and digital technologies: a parallel cohort study	224	BMC Medical Education	Ji, Z. and Jiang, Y. and Sun, H. and Qiu, B. and Chen, Y. and Li, M. and Fan, J. and Wang, J.	Radiology; Anesthesiology; Oncology?	LLM (ChatGPT, unspecified version)	CT-guided puncture training w/ one group being assisted by ChatGPT (tailored teaching content). GPT group increased theoretical knowledge; overall, GPT group performed better than traditional training.	pos.
29		The impact of deep learning on diagnostic performance in the differentiation of benign and malignant thyroid nodules	225	Medical Ultrasonography	Kaba, E. and Solak, M. and Varlƒ±k, A.T. and √áubuk√ßu, Y. and Sagir, L. and Sunnetci, K.M. and Alkan, A. and G√ºndoƒüdu, H. and Beyazal √áeliker, F.B. and Beyazal, M.	Radiology	AlexNet Deep Learning architecture	DL US assistance improves diagnostic accuracy, more so for less experienced radiologists	pos.
3	Non-physicians (medical students)	AI-enhanced guidance demonstrated improvement in novices‚Äô Apical-4-chamber and Apical-5-chamber views	225	BMC Medical Education	Karni, O. and Ben-Shitrit, I.B. and Perlin, A. and Jedwab, R. and Wacht, O. and Fuchs, L.
31		Video-Based Performance Analysis in Pituitary Surgery - Part 2: Artificial Intelligence Assisted Surgical Coaching	224	World Neurosurgery	Khan, D.Z. and Newall, N. and Koh, C.H. and Das, A. and Aapan, S. and Layard-Horsfall, H. and Baldeweg, S.E. and Bano, S. and Borg, A. and Chari, A. and Dorward, N.L. and Elserius, A. and Giannis, T. and Jain, A. and Stoyanov, D. and Marcus, H.J.	Neurosurgery	unspecified software for video analysis	AI surgical coaching program improved surgical performance during coaching period	pos.
32		Enhancing diagnostic accuracy of thyroid nodules: integrating self-learning and artificial intelligence in clinical training	225	Endocrine	Kim, D. and Hwang, Y.-A. and Kim, Y. and Lee, H.S. and Lee, E. and Lee, H. and Yoon, J.H. and Park, V.Y. and Rho, M. and Yoon, J. and Lee, S.E. and Kwak, J.Y.	Internal Medicine; Radiology	SEveRance Artificial Intelligence (AI-CAD)	Noted improvement in diagnostic performance across all experience levels with the use of AI-CAD for thyroid nodule US	pos.
33		An artificial intelligence-based nerve recognition model is useful as surgical support technology and as an educational tool in laparoscopic and robot-assisted rectal cancer surgery	224	Surgical Endoscopy	Kinoshita, K. and Maruyama, T. and Kobayashi, N. and Imanishi, S. and Maruyama, M. and Ohira, G. and Endo, S. and Tochigi, T. and Kinoshita, M. and Fukui, Y. and Kumazu, Y. and Kita, J. and Shinohara, H. and Matsubara, H.	Surgery (Gastroenterology)	Deep Learning (U-Net)	Nerve recognition improved across experience levels with AI recognition videos; medical students showed greater improvements	pos.
34		Evaluation of physician performance using a concurrent-read artificial intelligence system to support breast ultrasound interpretation	222	Breast	Lai, Y.-C. and Chen, H.-H. and Hsu, J.-F. and Hong, Y.-J. and Chiu, T.-T. and Chiou, H.-J.	Radiology	Deep Learning (BU-CAD)	Diagnostic performance and time spent improved with AI system use	pos.
35	No comparison	Surgical education reimagined: the convergence of learning theories and artificial intelligence	226	BMC Medical Education	Lee, F. and Wong, S.W.
36		Impact of an AI software on the diagnostic performance and reading time for the detection of cerebral aneurysms on time of flight MR-angiography	224	Neuroradiology	Lehnen, N.C. and Schievelkamp, A.-H. and Gronemann, C. and Haase, R. and Krause, I. and Gansen, M. and Fleckenstein, T. and Dorn, F. and Radbruch, A. and Paech, D.	Neuroradiology	CNN (mdbrain)	Improved specifity and reading times across experience levels for aneurysm detection w AI software	pos.
37		Enhancing trainee performance in obstetric ultrasound through an artificial intelligence system: randomized controlled trial	224	Ultrasound in Obstetrics and Gynecology	Lei, T. and Zheng, Q. and Feng, J. and Zhang, L. and Zhou, Q. and He, M. and Lin, M. and Xie, H.N.	OBGYN	unspecified	Inexperienced obstetrics residence improved prenatal obstetric US skills with AI assistance; gap between inexperienced and experts diminished with AI assistance	pos.
38		Enhancing sonologist examination performance with large language models: an analytical study of ChatGPT-4 and Claude 3	225	Medical Ultrasonography	Li, X. and Chen, Z. and Xie, T. and Liang, J. and Chen, F.
39	No comparison	Collaborative AI for precision neurorehabilitation: a¬†roadmap	225	Journal of NeuroEngineering and Rehabilitation	Liew, S.-L. and Cotton, R.J. and Burdet, E. and Berm√∫dez i Badia, S. and Celnik, P. and Cole, J.H. and Liu, R. and Soekadar, S.R. and Winstein, C. and Schweighofer, N.
4		Computed tomography (CT) structured reporting generation based on the intelligent assisted diagnosis system for rectal cancer staging and evaluation of its clinical application	225	Clinical Radiology	Liu, K. and Qiu, C. and Xia, Y. and Li, C. and Zhang, H. and Guo, W. and Wang, W. and Wan, S. and Zou, B.	Emergency(?)	YOLOs(?) CNN and ImageNet	Primarily about model training, but part 2 used first year physicians for intubation training; those with AI laryngoscope training had superior performance and reduced time compared to normal video laryngoscope training.	pos.
41		Application of an artificial intelligence-based airway identification system in tracheal intubation	226	BMC Anesthesiology	Liu, K. and Tang, H. and Wang, Z.	Radiology	CNN	AI-assisted junior radiologists had outcomes comparable to senior radiologists	pos.
42		Improving the Real-time Classification of Disease Severity in Ulcerative Colitis: Artificial Intelligence as the Trigger for a Second Opinion	225	American Journal of Gastroenterology	Lo, B. and M√∏ller, B. and Igel, C. and Wildt, S. and Vind, I. and Bendtsen, F. and Burisch, J. and Ibragimov, B.
43		Evaluating the impact of AI assistance on decision-making in emergency doctors interpreting chest X-rays: a multi-reader multi-case study	225	Emergency Medicine Journal	Lyell, D. and Dinh, M. and Gillett, M. and Abraham, N. and Symes, E.R. and Susanto, A.P. and Chakar, B.A. and Seimon, R.V. and Coiera, E. and Magrabi, F.	Emergency	Annalise Enterprise CXR tool	AI-assited chest Xray interpretation improved diagnosis with largest benefits seen in senior residents (interesting)	pos.
44	Non-physicians (medical students)	Artificial Intelligence-Based Video Feedback to Improve Novice Performance on Robotic Suturing Skills: A Pilot Study	224	Journal of Endourology	Ma, R. and Kiyasseh, D. and Laca, J.A. and Kocielnik, R. and Wong, E.Y. and Chu, T.N. and Cen, S. and Yang, C.H. and Dalieh, I.S. and Haque, T.F. and Goldenberg, M.G. and Huang, X. and Anandkumar, A. and Hung, A.J.
45		Leveraging the Capabilities of AI: Novice Neurology-Trained Operators Performing Cardiac POCUS in Patients with Acute Brain Injury	224	Neurocritical Care	Mears, J. and Kaleem, S. and Panchamia, R. and Kamel, H. and Tam, C. and Thalappillil, R. and Murthy, S. and Merkler, A.E. and Zhang, C. and Ch'ang, J.H.	Neurology	DL US guidance	Neurology providers w minimal to no cardiac POCUS training were able to obtain diagnostic-quality cardiac images with DL guidance	pos.
46		Influence of artificial intelligence on the diagnostic performance of endoscopists in the assessment of Barrett's esophagus: A tandem randomized and video trial	224	Endoscopy	Meinikheim, M. and Mendel, R. and Palm, C. and Probst, A. and Muzalyova, A. and Scheppach, M.W. and Nagl, S. and Schnoy, E. and Rommele, C. and Schulz, D.A.H. and Schlottmann, J. and Prinz, F. and Rauber, D. and R√ºckert, T. and Matsumura, T. and Fern√°ndez-Esparrach, G. and Parsa, N. and Byrne, M.F. and Messmann, H. and Ebigbo, A.	Gastroenterology	Deep learning (DeepLabV3)	Non-expert performance of BE recognition improved with AI assistance	pos.
47		Artificial Intelligence Improves the Ability of Physicians to Identify Prostate Cancer Extent	224	Journal of Urology	Mota, S.M. and Priester, A. and Shubert, J. and Bong, J. and Sayre, J. and Berry-Pusey, B. and Brisbane, W.G. and Natarajan, S.	Urology	Unfold AI	AI-assisted cancer contouring system was significantly better than physicians alone	pos.
48	No comparison	A vision-language model for enhanced MCI identification in Alzheimer's disease through neuropsychological and neuroimaging data integration	226	Neural Networks	Nie, Y. and Cui, Q. and Li, W. and L√º, Y. and Yu, W.
49		Evaluation of the impact of artificial intelligence-assisted image interpretation on the diagnostic performance of clinicians in identifying pneumothoraces on plain chest X-ray: a multi-case multi-reader study	224	Emergency Medicine Journal	Novak, A. and Ather, S. and Gill, A. and Aylward, P. and Maskell, G. and Cowell, G.W. and Morgado, A.T.E. and Duggan, T. and Keevill, M. and Gamble, O. and Akrama, O. and Belcher, E. and Taberham, R. and Hallifax, R. and Bahra, J. and Banerji, A. and Bailey, J. and James, A. and Ansaripour, A. and Spence, N. and Wrightson, J. and Jarral, W. and Barry, S. and Bhatti, S. and Astley, K. and Shadmaan…	Emergency	GE PTX algorithm	Reader sensitivity for pneumothoracies increased with AI assistance; largest increase came from junior readers (less experienced)	pos.
5		The implementation of computer-aided detection in an initial endoscopy training improves the quality measures of trainees‚Äô future colonoscopies: a retrospective cohort study	225	Surgical Endoscopy	Orzeszko, Z. and Gach, T. and Necka, S. and Ochwat, K. and Major, P. and Szura, M.	Surgery (gastroenterology)	ENDO-AID OIP-1	AI-trained (CADe) endoscopists showed significant improvements in surgery than those trained conventionally	pos.
51		Effect of Deep Learning-Based Artificial Intelligence on Radiologists‚Äô Performance in Identifying Nigrosome 1 Abnormalities on Susceptibility Map-Weighted Imaging	225	Korean Journal of Radiology	Park, J. and Lim, C.Y. and Won, S.Y. and Na, H.K. and Lee, P.H. and Baek, S.-Y. and Roh, Y.H. and Seong, M. and Sim, Y. and Kim, E.Y. and Kim, S.T. and Sohn, B.	Radiology	Deep learning (YOLOX and SparseInst)	AI assistance signifcantly enhanced diagnostic performance; less experienced radiologists had greater improvements	pos.
52		Artificial Intelligence-Based Diagnostic Support System for Patent Ductus Arteriosus in Premature Infants	224	Journal of Clinical Medicine	Park, S. and Moon, J. and Eun, H. and Hong, J.-H. and Lee, K.	Pediatrics (Neonatology)	unspecified	PDA diagnosis was significantly improved with developed AI model	pos.
53	No comparison	Task-Technology Fit of Artificial Intelligence-based clinical decision support systems: a review of qualitative studies	225	BMC Medical Informatics and Decision Making	Parsons, C.S. and Zuiderwijk, A. and Orchard, N.A. and Oosterhoff, J.H.F. and Reuver, M.
54		Care to Explain? AI Explanation Types Differentially Impact Chest Radiograph Diagnostic Performance and Physician Trust in AI	224	Radiology	Prinster, D. and Mahmood, A. and Saria, S. and Jeudy, J. and Lin, C.T. and Yi, P.H. and Huang, C.-M.	Radiology	DL (ChestAId)	local AI explanations increased diagnostic accuracy	pos./neut.
55	No comparison	Specialised Competencies and Artificial Intelligence in Perioperative Care: Contributions Toward Safer Practice	225	Healthcare (Switzerland)	Raposo, S. and Mascarenhas, M. and Correia Bezerra, R. and Ferreira, J.C.
56		Artificial Intelligence for Real-Time Prediction of the Histology of Colorectal Polyps by General Endoscopists	224	Annals of Internal Medicine	Rex, D.K. and Bhavsar-Burke, I. and Buckles, D. and Burton, J. and Cartee, A. and Comar, K. and Edwards, A. and Fennimore, B. and Fischer, M. and Gerich, M. and Gilmore, A. and Hamdeh, S. and Hoffman, J. and Ibach, M. and Jackson, M. and James-Stevenson, T. and Kaltenbach, T. and Kaplan, J. and Kapur, S. and Kohm, D. and Kriss, M. and Kundumadam, S. and Kyanam-Kabir-Baig, K.R. and Menard-Katcher,…
57		Nonradiology Health Care Professionals Significantly Benefit From AI Assistance in Emergency-Related Chest Radiography Interpretation	224	Chest	Rudolph, J. and Huemmer, C. and Preuhs, A. and Buizza, G. and Hoppe, B.F. and Dinkel, J. and Koliogiannis, V. and Fink, N. and Goller, S.S. and Schwarze, V. and Mansour, N. and Schmidt, V.F. and Fischer, M. and J√∂rgens, M. and Ben Khaled, N. and Liebig, T. and Ricke, J. and Rueckel, J. and Sabel, B.O.	Radiology; Emergency	unspecified	Non-radiology residents significantly improved CXR reading with AI assistance	pos.
58		Artificial intelligence-enhanced navigation for nerve recognition and surgical education in laparoscopic colorectal surgery	225	Surgical Endoscopy	Ryu, S. and Imaizumi, Y. and Goto, K. and Iwauchi, S. and Kobayashi, T. and Ito, R. and Nakabayashi, Y.	Surgery (GE)	Eureka AI system	Variable recognition rates among trainees with AI navigation	neutr.
59		Artificial Intelligence-Powered Clinical Decision Support and Simulation Platform for Radiology Trainee Education	223	Journal of Digital Imaging	Shah, C. and Davtyan, K. and Nasrallah, I. and Bryan, R.N. and Mohan, S.	Radiology	Galileo CDS	AI-assisted MRI readings showed no significant difference in trainees	neutr.
6		AI-augmented clinical decision in paediatric appendicitis: can an AI-generated model improve trainees‚Äô diagnostic capability?	224	European Journal of Pediatrics	Shikha, A. and Kasem, A. and Han, W.S.P. and Wong, J.H.L.	Pediatrics	AiPAD (Decision tree)	Trainee diagnostic accuracy improved with AI-assistance, rivaling supervisors	pos.
61		The virtual reference radiologist: comprehensive AI assistance for clinical image reading and interpretation	224	European Radiology	Siepmann, R. and Huppertz, M. and Rastkhiz, A. and Reen, M. and Corban, E. and Schmidt, C. and Wilke, S. and Schad, P. and Yuksel, C. and Kuhl, C. and Truhn, D. and Nebelung, S.	Radiology	LLM (GPT-4)	Slight diagnostic improvement w GPT assistance; improved confidence w GPT use	pos.
62		Assessing the Performance of Artificial Intelligence Assistance for Prostate MRI: A Two-Center Study Involving Radiologists With Different Experience Levels	225	Journal of Magnetic Resonance Imaging	Sun, Z. and Wang, K. and Gao, G. and Wang, H. and Wu, P. and Li, J. and Zhang, X. and Wang, X.	Radiology	unspecified	AI assistance significantly improved less-experienced radiologists' diagnostic accuracy	pos.
63		A Deep Learning Model Enhances Clinicians' Diagnostic Accuracy to More Than 96% for Anterior Cruciate Ligament Ruptures on Magnetic Resonance Imaging	224	Arthroscopy - Journal of Arthroscopic and Related Surgery	Wang, D.-Y. and Liu, S.-G. and Ding, J. and Sun, A.-L. and Jiang, D. and Jiang, J. and Zhao, J.-Z. and Chen, D.-S. and Ji, G. and Li, N. and Yuan, H.-S. and Yu, J.-K.	Radiology; Sports Med	DL (developed model)	AI-assistance significantly improved diagnostic accuracy, especially for less experienced clinicians	pos.
64		Comparative analysis of traditional and integrated approaches to radiology training for residents	225	BMC Medical Education	Wang, J. and Wang, L. and Yang, Z. and Zou, Q. and Liu, Y.	Radiology	various, unspecified	AI-integrated training modules improved radiology residents theoretical knowledge, compared to traditional training modules	pos.
65		Using an artificial intelligence software improves emergency medicine physician intracranial haemorrhage detection to radiologist levels	224	Emergency Medicine Journal	Warman, P. and Warman, A. and Warman, R. and Degnan, A. and Blickman, J. and Smith, D. and McHale, P. and Coburn, Z. and McCormick, S. and Chowdhary, V. and Dash, D. and Sangal, R. and Vadhan, J. and Bueso, T. and Windisch, T. and Neves, G.
66		Impact of an AI-based laparoscopic cholecystectomy coaching program on the surgical performance: a randomized controlled trial	224	International Journal of Surgery	Wu, S. and Tang, M. and Liu, J. and Qin, D. and Wang, Y. and Zhai, S. and Bi, E. and Li, Y. and Wang, C. and Xiong, Y. and Li, G. and Gao, F. and Cai, Y. and Gao, P. and Wu, Z. and Cai, H. and Liu, J. and Chen, Y. and Fang, C. and Yao, L. and Jiang, J. and Peng, B. and Wu, H. and Li, A. and Wang, X.	Surgery	SurgSmart	AI-assisted LC coaching improved surgical perfomance	pos.
67		A large language model improves clinicians‚Äô diagnostic performance in complex critical illness cases	225	Critical Care	Wu, X. and Huang, Y. and He, Q.	Critical Care	LLM (DeepSeek R1)	AI-assisted groups showed significantly increased diagnostic accuracy	pos.
68		A deep learning algorithm that aids visualization of femoral neck fractures and improves physician training	224	Injury	Xing, P. and Zhang, L. and Wang, T. and Wang, L. and Xing, W. and Wang, W.	Orthopedics	R-CNN (DenseNet-121)	AI-assisted fracture detection significantly improved diagnostic accuracy	pos.
69		Development and Validation an AI Model to Improve the Diagnosis of Deep Infiltrating Endometriosis for Junior Sonologists	225	Ultrasound in Medicine and Biology	Xu, J. and Zhang, A. and Zheng, Z. and Cao, J. and Zhang, X.	Sonology/Gynecology	DL (YOLO)	Diagnostic performance improved with AI-assisted US	pos.
7		Impact of an artificial intelligence-aided endoscopic diagnosis system on improving endoscopy quality for trainees in colonoscopy: Prospective, randomized, multicenter study	224	Digestive Endoscopy	Yamaguchi, D. and Shimoda, R. and Miyahara, K. and Yukimoto, T. and Sakata, Y. and Takamori, A. and Mizuta, Y. and Fujimura, Y. and Inoue, S. and Tomonaga, M. and Ogino, Y. and Eguchi, K. and Ikeda, K. and Tanaka, Y. and Takedomi, H. and Hidaka, H. and Akutagawa, T. and Tsuruoka, N. and Noda, T. and Tsunada, S. and Esaki, M.	Gastroenterology	CAD-EYE	No significant improvements between AI-assisted and non-assisted physicians; but decreased miss rates with AI-assistance	neutr./pos.
71		Accuracy of radiologists and radiology residents in detection of paediatric appendicular fractures with and without artificial intelligence	224	BMJ Health and Care Informatics	Yogendra, P.M. and Goh, A.G.W. and Yee, S.Y. and Jawan, F. and Koh, K.K.N. and Tan, T.S.E. and Woon, T.K. and Yeap, P.M. and Tan, M.O.	Radiology	RBfracture (commercial)	AI-assisted diagnosis significantly better compared to non-assisted	pos.
72		Deep Learning-Assisted Quantitative Measurement of Thoracolumbar Fracture Features on Lateral Radiographs	224	Neurospine	Yuh, W.T. and Khil, E.K. and Yoon, Y.S. and Kim, B. and Yoon, H. and Lim, J. and Lee, K.Y. and Yoo, Y.S. and An, K.D.	Neurosurgery	Mask Region-Based Convolutional Neural Networks	AI-assisted measurements improved performance, especially for novices	pos.
73		Artificial intelligence improves resident detection of pediatric and young adult upper extremity fractures	224	Skeletal Radiology	Zech, J.R. and Ezuma, C.O. and Patel, S. and Edwards, C.R. and Posner, R. and Hannon, E. and Williams, F. and Lala, S.V. and Ahmad, Z.Y. and Moy, M.P. and Wong, T.T.	Radiology; Pediatrics	Faster R-CNN X11-FPN model	AI-assistance improved diagnostic accuracy for less experienced physicians	pos.
74		A study on the improvement in the ability of endoscopists to diagnose gastric neoplasms using an artificial intelligence system	224	Frontiers in Medicine	Zhang, B. and Zhang, W. and Yao, H. and Qiao, J. and Zhang, H. and Song, Y.	Gastroenterology	Deep learning	AI-assistance significantly improved intermediate physicians, more so than experts	pos.
75		Enhancing Radiologists‚Äô Performance in Detecting Cerebral Aneurysms Using a Deep Learning Model: A Multicenter Study	225	Academic Radiology	Zhuo, L. and Zhang, Y. and Song, Z. and Mo, Z. and Xing, L. and Zhu, F. and Meng, H. and Chen, L. and Qu, G. and Jiang, P. and Wang, Q. and Cheng, R. and Mi, X. and Liu, L. and Hong, N. and Cao, X. and Wu, D. and Wang, J. and Yin, X.	Radiology	Deep Learning	AI-assistance reduced interpretation time and increased diagnostic accuracy, more so in junior radiologists than senior rads.	pos.
6 total for review
